# Supplementary material
Source: Research Square preprint supplement (doi:10.21203/rs.3.rs-9184162/v1)
Supplement: Supplementary file 1 [file 191dd127bd2a56e03127a73a.docx]

| Suppl. Table 4- Proteins identified using orbitrap fusion mass spectrometry in banana fruit (pulp) tissue at 12-DAR (days after ripening). | | | | | | | | | | |
| --- | --- | --- | --- | --- | --- | --- | --- | --- | --- | --- |
| Accession No./Protein ID | **Origin/Taxonomy** | **Protein description** | **Sum Peptide score** | **Coverage peptide (%)** | | **A.A** | **Protein Molecular weight (KDa)** | **Unique Peptides** | | **Peptide sequence** |
| Amino acid metabolism | | | | | | | | | | |
| M0S335 | *Musa acuminata* subsp. malaccensis | Phosphoglycerate kinase | 54.012 | 19 | | 401 | 42.4 | 3 | | VDLNVPLDDSQKITDDTR  VDLNVPLDDSQK  ELDYLVGAVANPK |
| M0RTB7 | *Musa acuminata* subsp. malaccensis | Phosphoglycerate kinase | 40.651 | 20 | | 492 | 57.2 | 4 | | KPFAAIVGGSK |
| M0SUG2 | *Musa acuminata* subsp. malaccensis | Phosphoglycerate kinase | 38.617 | 15 | | 401 | 42.2 | 1 | | FYKEEEKNDPEFAK |
| M0TVU9 | *Musa acuminata* subsp. malaccensis | Phosphoglycerate kinase | 33.242 | 22 | | 401 | 42.4 | 6 | | TFSESLDTTK  FALGTEAIAK |
| M0SU77 | *Musa acuminata* subsp. malaccensis | Phosphoglycerate kinase | 19.03 | 10 | | 479 | 50 | 3 | | SVGDLTAADLK  GVTTIIGGGDSVAAVEK |
| M0SUJ7 | *Musa acuminata* subsp. malaccensis | Aminomethyltransferase | 19.552 | 8 | | 413 | 44.6 | 3 | | GGAIDDSVVTK |
| M0SSL0 | *Musa acuminata* subsp. malaccensis | Phosphoacetylglucosamine mutase | 10.535 | 5 | | 561 | 60.5 | 2 | | SEGSILASTVYR  VYAEASTQEAADSLAR |
| M0RZV1 | *Musa acuminata* subsp. malaccensis | Glycine cleavage system P protein | 5.423 | 2 | | 977 | 106 | 2 | | ATAGIEPEDVAKR  IDNVYGDR |
| M0SHZ7 | *Musa acuminata* subsp. malaccensis | Glycine cleavage system P protein | 9.673 | 2 | | 987 | 106.6 | 2 | | IIGVSVDSSGKPALR |
| M0TMR2 | *Musa acuminata* subsp. malaccensis | Branched chain amino acid aminotransferase | 1.847 | 2 | | 414 | 45.2 | 1 | | GQGYQVEER |
| Sugar metabolism | | | | | | | | | | |
| M0U300 | *Musa acuminata* subsp. malaccensis | UTP-glucose-1-phosphate uridylyltransferase | 182.817 | 43 | | 467 | 51.3 | 26 | IVEKYANSNIEIHTFNQSQYPR  MEIIPNPKEVDGVK | |
| M0TNG5 | *Musa acuminata* subsp. malaccensis | Fructose-bisphosphate aldolase | 116.185 | 45 | | 365 | 39.1 | 10 | TADGKPFVEVLK  VAPEVVAEYTVR | |
| M0T0S2 | *Musa acuminata* subsp. malaccensis | ATP-dependent 6-Phosphofructokinase | 19.702 | 15 | | 471 | 51.5 | 8 | GFYSAEPVPLDPK  GGFNLEK | |
| M0TLM5 | *Musa acuminata* subsp. malaccensis | Fructose-bisphosphate aldolase | 84.107 | 35 | | 317 | 34.3 | 3 | LASINVENVEANRR  GEGVSESLHVK | |
| M0TNV2 | *Musa acuminata* subsp. malaccensis | Fructose-bisphosphate aldolase | 71.513 | 33 | | 333 | 35.8 | 3 | GILAADESTGTIGK | |
| M0T021 | *Musa acuminata* subsp. malaccensis | Fructose-bisphosphate aldolase | 56.401 | 24 | | 391 | 42.9 | 10 | RLASIGLENTEANR  EAAWGLAR | |
| M0U9P4 | *Musa acuminata* subsp. malaccensis | Fructose-bisphosphate aldolase | 34.862 | 14 | | 392 | 42.9 | 4 | YTGEGESEESKQGMFVK | |
| Starch biosynthesis | | | | | | | | | | |
| M0RY27 | *Musa acuminata* subsp. malaccensis | Starch synthase, chloroplastic/amyloplastic | 56.315 | 18 | | 616 | 68 | 8 | QLAQLEDMFPNKVR  EALQAELGLPVDR | |
| M0RYE9 | *Musa acuminata* subsp. malaccensis | Glucose-1-phosphate adenylyltransferase | 30.822 | 16 | | 525 | 57.5 | 8 | VDTTILGLDNER  AKPAVPLGANYR | |
| Secondary metabolism | | | | | | | | | | |
| M0RTJ1 | *Musa acuminata* subsp. malaccensis | Glyceraldehyde-3-phosphate dehydrogenase | 55.067 | 9 | | 418 | 46 | 3 | SSIFDAK | |
| M0T1L6 | *Musa acuminata* subsp. malaccensis | Glyceraldehyde-3-phosphate dehydrogenase | 49.105 | 23 | | 394 | 42.9 | 4 | AGIGLSDAFMK | |
| M0UAB0 | *Musa acuminata* subsp. malaccensis | Glyceraldehyde-3-phosphate dehydrogenase | 36.822 | 18 | | 359 | 39.2 | 1 | VIISAPSK | |
| M0TEE8 | *Musa acuminata* subsp. malaccensis | Glyceraldehyde-3-phosphate dehydrogenase | 11.564 | 9 | | 429 | 45.6 | 1 | LTGMAFR | |
| M0SAT8 | *Musa acuminata* subsp. malaccensis | Formate dehydrogenase mitochondrial | 45.956 | 26 | | 383 | 42.1 | 9 | YMPNQAMTPHISGTTIDGQLR  ANEYASLNPK | |
| M0RGD1 | *Musa acuminata* subsp. malaccensis | Acetyltransferase component of pyruvate dehydrogenase complex | 43.674 | 14 | | 635 | 68.9 | 9 | SSAPTEVKTPSEPSQSK  AAEPNASKTEEVSHSEDR | |
| M0TUH8 | *Musa acuminata* subsp. malaccensis | Glucose-6-phosphate-1-dehydrogenase | 29.07 | 14 | | 520 | 59.4 | 4 | YVSGSYDSEDGFQLLNK  SSSGQTEVLSR | |
| M0TAY0 | *Musa acuminata* subsp. malaccensis | Glucose-6-phosphate-1-dehydrogenase | 16.083 | 5 | | 620 | 70.3 | 1 | SSSGQTEVLSR | |
| M0RPH1 | *Musa acuminata* subsp. malaccensis | Glucose-6-phosphate-1-dehydrogenase | 4.793 | 3 | | 586 | 66.8 | 1 | GPVGAYYLGANHGVR | |
| M0RHF3 | *Musa acuminata* subsp. malaccensis | Glucose-6-phosphate-1-dehydrogenase | 2.008 | 2 | | 595 | 66.8 | 1 | YSKEIPDAYER | |
| M0S1I5 | *Musa acuminata* subsp. malaccensis | L-lactate dehydrogenase | 27.004 | 20 | | 350 | 38.2 | 6 | SAEALWDLQQK  VIGSGTNLDSSR | |
| M0T1H5 | *Musa acuminata* subsp. malaccensis | Pyruvate dehydrogenase E1 component subunit beta | 25.981 | 14 | | 414 | 45 | 5 | MAVPQVDDIVR  VLSPYSSEDAR | |
| M0S0Z1 | *Musa acuminata* subsp. malaccensis | Pyruvate dehydrogenase E1 component subunit beta | 25.952 | 20 | | 324 | 35.8 | 3 | RGDYVPGLK  YHGHSMSDPGSTYR | |
| M0SVE1 | *Musa acuminata* subsp. malaccensis | 6-phosphogluconate dehydrogenase, decarboxylating | 23.922 | 8 | | 464 | 51.2 | 3 | VSANLVQAQR  TTSKVDETVER | |
| M0T8J4 | *Musa acuminata* subsp. malaccensis | 3-Isopropylmalate dehydrogenase | 8.22 | 3 | | 967 | 106.6 | 3 | SVEAGKQVAALH  RIEAAVINTLNR | |
| M0U0C6 | *Musa acuminata* subsp. malaccensis | Delta-aminoevulinic acid-dehydratase | 9.391 | 7 | | 428 | 46.7 | 3 | YASAFYGPFR  TYQMNPANYR | |
| M0RXD7 | *Musa acuminata* subsp. malaccensis | S-(hydroxymethyl) glutathione dehydrogenase | 8.237 | 6 | | 379 | 40.7 | 2 | LATGVGVMLNDRK  FGVNEFVNPK | |
| M0RSM0 | *Musa acuminata* subsp. malaccensis | Protoporphyrinogen oxidase | 1.662 | 1 | | 536 | 57.5 | 1 | GQTVASFR | |
| Fatty acid metabolism | | | | | | | | | | |
| M0SDU5 | *Musa acuminata* subsp. malaccensis | Lipoxygenase | 49.574 | 14 | | 846 | 95 | 11 | RGMAVEDPAAEHGLK  IRELEDTTMYASR | |
| M0SEK3 | *Musa acuminata* subsp. malaccensis | Catalase | 44.36 | 15 | | 492 | 57.1 | 4 | NHSHATQDLYDSIAAGNYPEWK  DGIKFPDVIHAFKPNPK | |
| M0SCK2 | *Musa acuminata* subsp. malaccensis | Dihydrolipoamide acetyl transferase component of pyruvate dehydrogenase | 4.406 | 3 | | 407 | 42.4 | 1 | NMVESLSVPTFR | |
| M0SGX3 | *Musa acuminata* subsp. Malaccensis | Uricase | 4.421 | 7 | | 306 | 34.1 | 2 | TTQSGFEGFVR | |
| TCA cycle | | | | | | | | | | |
| M0RFU7 | *Musa acuminata* subsp. malaccensis | D-3-phosphoglycerate dehydrogenase | 67.45 | 20 | | 616 | 65 | 8 | NKYVGVSLVGK | |
| M0U2N8 | *Musa acuminata* subsp. malaccensis | D-3-phosphoglycerate dehydrogenase | 27.363 | 12 | | 525 | 55.5 | 2 | YVGVSLVGK  LAVQLVAGGSGIK | |
| M0SN09 | *Musa acuminata* subsp. malaccensis | D-3-phosphoglycerate dehydrogenase | 14.103 | 6 | | 569 | 60.1 | 2 | NKYVGVSLVGK | |
| M0RI43 | *Musa acuminata* subsp. malaccensis | Citrate synthase | 45.946 | 13 | | 476 | 52.4 | 8 | IYDPGYLNTAPVR  VLGKVPTIAAAAYLR | |
| M0RL80 | *Musa acuminata* subsp. malaccensis | Glucose-6-phosphate isomerase | 40.154 | 18 | | 580 | 63.9 | 5 | NGLLEIQK  VNQGLTVYGNK | |
| M0TFQ1 | *Musa acuminata* subsp. malaccensis | Glucose-6-phosphate isomerase | 32.329 | 14 | | 631 | 70.2 | 8 | SGSWVGATGK  TFTTAETMLNAR | |
| M0U0G9 | *Musa acuminata* subsp. malaccensis | Glucose-6-phosphate isomerase | 31.837 | 19 | | 277 | 30.7 | 3 | VNQGLTVYGNK  AAGDVLALQK | |
| M0T6P1 | *Musa acuminata* subsp. malaccensis | Pyruvate kinase | 32.285 | 16 | | 529 | 58.1 | 7 | SGDLYQTQIFAK  HPAESTSSSNESVLK | |
| M0SSW3 | *Musa acuminata* subsp. malaccensis | Pyruvate kinase | 11.794 | 7 | | 418 | 46.2 | 2 | AFNSPLPER  AEVADVSEAVK | |
| M0SQY7 | *Musa acuminata* subsp. malaccensis | Pyruvate kinase | 10.325 | 5 | | 567 | 62.8 | 2 | SATLPSITEK  LAEEGMNVAR | |
| M0S8U3 | *Musa acuminata* subsp. malaccensis | Pyruvate kinase | 5.9 | 4 | | 418 | 46.3 | 1 | SAEVINHLK  SFNSPLPER | |
| M0TKF8 | *Musa acuminata* subsp. malaccensis | Pyruvate kinase | 21.022 | 10 | | 603 | 66.4 | 4 | EGEQIALVQSGR  SATLPSITEK | |
| M0TE11 | *Musa acuminata* subsp. malaccensis | Pyrophosphate-fructose 6-phosphotransferase subunit beta | 22.693 | 9 | | 564 | 61.6 | 2 | STGKYYHFVR | |
| M0TU65 | *Musa acuminata* subsp. malaccensis | Phosphotransferase | 21.281 | 9 | | 591 | 64.5 | 4 | VSALVNDTIGTLAGGR  LNEVLGIPDTSLK | |
| M0TKP4 | *Musa acuminata* subsp. malaccensis | Glucose-6-phosphate 1-epimerase | 19.394 | 12 | | 339 | 37.2 | 3 | TLNKDPDPSNPLEGK  ASIAGVSVK | |
| Signal transduction | | | | | | | | |  | |
| M0SMH7 | *Musa acuminata* subsp. malaccensis | Biotin carboxylase | 32.533 | 17 | | 531 | 58 | 7 | SEAAAAFGNDGVYLEK  ITSYLPSGGPFVR | |
| M0T458 | *Musa acuminata* subsp. malaccensis | Tubulin beta chain | 23.341 | 10 | | 423 | 47.1 | 1 | EVDEQMLNVQNK | |
| M0TM64 | *Musa acuminata* subsp. malaccensis | Signal recognition particle 54 kDa protein | 10.211 | 6 | | 497 | 55 | 3 | DLIIVDTSGR  GGGALSAVAATK | |
| M0TL18 | *Musa acuminata* subsp. malaccensis | Adenylyl cyclase associated protein | 6.551 | 3 | | 474 | 50.7 | 1 | TGVIAATEKSPR | |
| M0TXN3 | *Musa acuminata* subsp. malaccensis | Signal recognition particle subunit SRP68 | 3.526 | 1 | | 601 | 68.1 | 1 | AVSAVLGQR | |
| M0SS87 | *Musa acuminata* subsp. malaccensis | Tubulin beta chain | 18.625 | 5 | | 446 | 50.2 | 1 | FPGQLNSDLR | |
| M0S7D0 | *Musa acuminata* subsp. malaccensis | Tubulin alpha chain | 14.236 | 9 | | 450 | 49.6 | 4 | SLDIERPTYTNLNR  LSVDYGKK | |
| M0RZY3 | *Musa acuminata* subsp. malaccensis | Tubulin gamma chain | 2.361 | 2 | | 478 | 53.7 | 1 | VINGIQNSEYR | |
| Redox homeostasis | | | | | | | | | | |
| M0RNE8 | *Musa acuminata* subsp. malaccensis | Aconitate hydratase | 111.571 | 21 | | 986 | 107.1 | 13 | QVEIPFKPAR  LSAFDAATR | |
| M0SJA4 | *Musa acuminata* subsp. malaccensis | Cysteine synthase | 60.199 | 28 | | 325 | 34.3 | 4 | TPLVYLNK  TPNSYILQQFENPSNPK | |
| M0SQU8 | *Musa acuminata* subsp. malaccensis | Cysteine synthase | 41.974 | 24 | | 325 | 34.3 | 3 | IGYSMIADAEEK | |
| M0TWV0 | *Musa acuminata* subsp. malaccensis | Cysteine synthase | 28.735 | 18 | | 380 | 40.5 | 5 | IQGIGAGFVPR  AFGAELVLTDSAK | |
| M0SZX7 | *Musa acuminata* subsp. malaccensis | Cysteine synthase | 2.742 | 2 | | 359 | 38.8 | 1 | TPMVYLNK | |
| M0U3M5 | *Musa acuminata* subsp. malaccensis | Sulfurtransferase | 27.532 | 15 | | 377 | 41.1 | 5 | QNIEGQAYQHIDAR  ASAASEVIEK | |
| M0TSF7 | *Musa acuminata* subsp. malaccensis | NADH-cytochrome b5 reductase | 11.231 | 7 | | 277 | 30.9 | 2 | VGDYLSVKGPK  GSLDPQNFK | |
| Photosynthesis | | | | | | | | | | |
| M0SR05 | *Musa acuminata* subsp. malaccensis | Malate dehydrogenase | 66.884 | 27 | | 332 | 35.5 | 6 | VLVVANPANTNALILK  LNVQVSDVK | |
| M0SM75 | *Musa acuminata* subsp. malaccensis | Malate dehydrogenase | 27.975 | 11 | | 347 | 36.3 | 1 | RTQDGGTEVVEAK | |
| M0SVG9 | *Musa acuminata* subsp. malaccensis | Malate dehydrogenase | 15.253 | 13 | | 332 | 35.5 | 1 | EFAPSIPAK  ALGQISER | |
| M0T8J4 | *Musa acuminata* subsp. malaccensis | 3-isopropyl malate dehydrogenase | 8.22 | 3 | | 967 | 106.6 | 1 | RIEAAVINTLNR  SVEAGKQVAALH | |
| M0TRQ8 | *Musa acuminata* subsp. malaccensis | Succinate-CoA-ligase [ADP] forming | 36.93 | 18 | | 421 | 45 | 7 | SGLQGGVHIVK  LNFDDNAAFR | |
| M0TNG5 | *Musa acuminata* subsp. malaccensis | Fructose-bisphosphate aldolase | 116.185 | 45 | | 365 | 39.1 | 10 | NAAYIGTPGK  YHDELIK | |
| M0TNV2 | *Musa acuminata* subsp. malaccensis | Fructose-bisphosphate aldolase | 71.513 | 33 | 333 | | 35.8 | 3 | EGGVLPGIK | |
| M0T1M4 | *Musa acuminata* subsp. malaccensis | Fructose-bisphosphate aldolase | 70.754 | 35 | 329 | | 35.6 | 1 | EGGVLPGIKVDK | |
| M0T021 | *Musa acuminata* subsp. malaccensis | Fructose-bisphosphate aldolase | 56.401 | 24 | 391 | | 42.1 | 10 | RLASIGLENTEANR  SAAYYQQGAR | |
| M0U9P4 | *Musa acuminata* subsp. malaccensis | Fructose-bisphosphate aldolase | 34.862 | 14 | 392 | | 42.9 | 4 | EAQEALLVR | |
| M0TRQ8 | *Musa acuminata* subsp. malaccensis | Succinate-CoA-ligase [ADP] forming | 36.93 | 16 | 421 | | 45 | 7 | SGLQGGVHIVK  LNFDDNAAFR | |
| M0TDM1 | *Musa acuminata* subsp. malaccensis | Succinate dehydrogenase [ubiquinone] flavoprotein subunit, mitochondrial | 21.712 | 12 | 599 | | 65.8 | 3 | NSEGERFMER  VMQNNAAVFR | |
| M0SIV0 | *Musa acuminata* subsp. malaccensis | Glutathione reductase | 18.835 | 9 | 559 | | 60.5 | 5 | IVDPHTVDVDGK  SSDGLLSLR | |
| Molecular chapperones | | | | | | | | | | |
| M0S0K5 | *Musa acuminata* subsp. malaccensis | Protein disulfide-isomerase | 112.061 | 33 | 507 | | 56.3 | 16 | LAPEYEK | |
| M0TKD3 | *Musa acuminata* subsp. malaccensis | Ketol-acid reductoisomerase | 35.636 | 12 | 587 | | 63.4 | 5 | VTLAGHDEYIVR  DSLAATKSDIVVK | |
| M0TR12 | *Musa acuminata* subsp. malaccensis | T-complex protein 1 subunit beta | 22.096 | 9 | 606 | | 65.1 | 5 | SQLFINSYAK  VTEEDLQR | |
| M0UAX5 | *Musa acuminata* subsp. malaccensis | T-complex protein 1 subunit gamma | 10.304 | 6 | 535 | | 59.1 | 1 | AVLAVADLER  IDIDTVEK | |
| M0TQW9 | *Musa acuminata* subsp. malaccensis | GrpE protein homolog | 9.612 | 6 | | 323cla | 35.7 | 2 | AGIVSQELRR  LKADFENFRK | |
| Protein folding | | | | | | | | | | |
| M0RUP5 | *Musa acuminata* subsp. malaccensis | 26S proteasome non-ATPase regulatory subunit 2 homolog | 23.541 | 6 | | 888 | 97.2 | 5 | QQLELYVER  LSEGYLALAR | |
| M0RYR4 | *Musa acuminata* subsp. malaccensis | 26S proteasome non-ATPase regulatory subunit 1 homolog | 6.903 | 3 | | 1011 | 109.6 | 2 | AALEKPSSDDTSSGSTSGK  LEAIVER | |
| M0RJE7 | *Musa acuminata* subsp. malaccensis | Proteasome subunit alpha type | 19.394 | 12 | | 339 | 37.2 | 3 | RVTSPLLEPSSVEK  VTSPLLEPSSVEK | |
| M0S4T8 | *Musa acuminata* subsp. malaccensis | Proteasome subunit alpha type | 5.913 | 8 | | 249 | 27.1 | 2 | GTDTIVLGVEK  YIAGLQQK | |
| M0TYE4 | *Musa acuminata* subsp. malaccensis | Proteasome subunit beta type | 4.413 | 4 | | 273 | 29.2 | 1 | EGVIVAADSR | |
| M0TEG6 | *Musa acuminata* subsp. malaccensis | Proteasome subunit beta type | 2.103 | 3 | | 274 | 29.5 | 1 | GQTEYLR | |
| M0SHX4 | *Musa acuminata* subsp. malaccensis | Coatomer subunit gamma | 15.716 | 4 | | 887 | 98.5 | 1 | VILENATVR | |
| M0TMS7 | Musa acuminata subsp. malaccensis | Coatomer subunit gamma | 19.48 | 5 | | 887 | 98.7 | 2 | WSNEVQEAVQSR | |
| M0T4D8 | *Musa acuminata* subsp. malaccensis | Coatomer subunit beta | 6.457 | 2 | | 998 | 112.2 | 2 | SFEVTELPVR  DTNTFASASLDR | |
| M0S4Q6 | *Musa acuminata* subsp. malaccensis | Coatomer subunit epsilon | 4.324 | 3 | | 290 | 32 | 1 | MASAEDNFDR | |
| M0THF3 | *Musa acuminata* subsp. malaccensis | 60S acidic ribosomal protein | 17.527 | 10 | | 320 | 34.3 | 3 | VGSSEAALLAK  VKEYLKDPSK | |
| M0RG03 | *Musa acuminata* subsp. malaccensis | Carboxypeptidase | 4.496 | 5 | | 466 | 51.4 | 3 | KLYDEDESR  LDIKDAVK | |
| M0SGS3 | *Musa acuminata* subsp. malaccensis | Protein disulfide-isomerase | 5.582 | 4 | | 514 | 57.3 | 1 | LAPEYEK | |
| M0RZB1 | *Musa acuminata* subsp. malaccensis | SURF-1 like protein | 3.617 | 3 | | 391 | 44.3 | 1 | SSSPEIVDAK | |
| Nitrogen metabolism | | | | | | | | | | |
| M0SM28 | *Musa acuminata* subsp. malaccensis | Aspartate aminotransferase | 69.983 | 33 | | 421 | 46 | 14 | QQLFDALR  RAEQLLVNDPSR | |
| M0T713 | *Musa acuminata* subsp. malaccensis | Aspartate aminotransferase | 6.738 | 4 | | 429 | 47.8 | 2 | NMGLYGQR  LAYGEDSELIK | |
| M0TBH2 | *Musa acuminata* subsp. malaccensis | Aspartate aminotransferase | 16.422 | 13 | | 459 | 50.9 | 6 | LNLGVGAYR  NLGLYAER | |
| M0STN9 | *Musa acuminata* subsp. malaccensis | Glutamate decarboxylase | 56.315 | 27 | | 489 | 55.2 | 9 | NYVDMDEYPVTTELQNR  LRDDYFVMDPHK | |
| M0RHY2 | *Musa acuminata* subsp. malaccensis | Arginine biosynthesis bifunctional protein ArgJ, Chloroplastic | 3.408 | 3 | | 470 | 48.9 | 1 | IAHSVASSSLVK | |
| Energy and carbohydrate metabolism | | | | | | | | | | |
| M0SIS6 | *Musa acuminata* subsp. malaccensis | ATP synthase subunit beta | 84.871 | 29 | | 567 | 60.5 | 1 | ITDEFTGAGAIGK  IMNVIGEPIDEK | |
| M0U2D0 | *Musa acuminata* subsp. malaccensis | ATP synthase subunit beta | 84.019 | 31 | | 555 | 59.4 | 1 | IMNVIGEPIDEK | |
| M0RLV9 | *Musa acuminata* subsp. malaccensis | ATP synthase subunit d, mitochondrial | 4.367 | 8 | | 145 | 17.2 | 1 | AFDEVNSQLQTK | |
| M0TFC3 | *Musa acuminata* subsp. malaccensis | Malic enzyme | 31.674 | 10 | | 628 | 69.8 | 6 | RLELNASDGPSDTNALAK  LTQEETVAYVK | |
| Cell wall modification | | | | | | | | | | |
| M0SU22 | *Musa acuminata* subsp. malaccensis | Alpha-1,4-glucan phosphorylase | 180.1 | 28 | | 927 | 104.7 | 30 | QDVFNSFYK  SGNSVNWKEFPTK | |
| M0TCH7 | *Musa acuminata* subsp. malaccensis | Alpha-1,4-glucan phosphorylase | 105.944 | 23 | | 838 | 95 | 18 | QTYYLSMEYLQGR  QFAGNEELHAEWASAK | |
| M0SA45 | *Musa acuminata* subsp. malaccensis | 4-alpha-glucanotransferase | 65.711 | 18 | | 743 | 84 | 15 | QQLNDFR  RLLLSQGELK | |
| M0SC42 | *Musa acuminata* subsp. malaccensis | Pectinesterase | 38.745 | 14 | | 401 | 42.8 | 4 | SGSDLSVFYR  LPSPGQINTITAQGR | |
| M0RPM3 | *Musa acuminata* subsp. malaccensis | Pectinesterase | 25.241 | 10 | | 566 | 62.1 | 5 | NVVDGWTTFR  SQTNLMFMGDGIGK | |
| M0TGN6 | *Musa acuminata* subsp. malaccensis | Pectinesterase | 5.871 | 4 | | 507 | 54.4 | 1 | NVVDGSTTFR  GLRIENTAGPSK | |
| M0UAU8 | *Musa acuminata* subsp. malaccensis | Isocitrate dehydrogenase [NAD] subunit | 38.233 | 20 | | 367 | 40.2 | 2 | YDDVNLVTIR  TESFLTWESLESVRR | |
| M0T710 | *Musa acuminata* subsp. malaccensis | Peroxidase | 31.023 | 22 | | 264 | 28.2 | 4 | SLLHSDQELFNNGPADDLVR  LYSSSGSAFNR | |
| M0TBJ2 | *Musa acuminata* subsp. malaccensis | Peroxidase | 29.795 | 20 | | 366 | 40 | 7 | QALSNINSLR  SFEVIDEVK | |
| M0TPT9 | *Musa acuminata* subsp. malaccensis | Peroxidase | 11.261 | 7 | | 316 | 34.4 | 2 | LYDTDETLDQK  DSVVHYGGIHYR | |
| M0U687 | *Musa acuminata* subsp. malaccensis | Pectate lyase | 26.145 | 13 | | 454 | 49.3 | 6 | RVDTDQSTWK  YLAPTNPFAK | |
| M0TAX1 | *Musa acuminata* subsp. malaccensis | Pectate lyase | 1.524 | 2 | | 407 | 44.6 | 1 | FLAPNDRFAK | |
| M0TWG0 | *Musa acuminata* subsp. malaccensis | Alpha-mannosidase | 22.248 | 5 | | 1108 | 124.7 | 6 | QEFGIIPR  LSIGYSEAEK | |
| M0U6S4 | *Musa acuminata* subsp. malaccensis | Xyloglucan-endotransglucosylase/hydrolase | 24.841 | 15 | | 289 | 32.9 | 5 | YKVDYQYQPFVAR  VDYQYQPFVAR | |
| M0SQP6 | *Musa acuminata* subsp. malaccensis | Beta-galactosidase | 9.461 | 2 | | 871 | 95.4 | 2 | VLISGSIHYPR  FRTDNEPFKR | |
| M0TFG5 | *Musa acuminata* subsp. malaccensis | Pectin acetyl esterase | 9.648 | 7 | | 398 | 42.7 | 3 | SLLPASATVK  NPDFYNWNR | |
| M0T2F6 | *Musa acuminata* subsp. malaccensis | Beta-hexoaminidase | 4.244 | 2 | | 550 | 62.1 | 1 | GIAAAPVTNK | |
| M0RUM6 | *Musa acuminata* subsp. malaccensis | Expansin | 2.654 | 4 | | 250 | 27.3 | 1 | TAYDVAPATWK | |
| M0SA45 | *Musa acuminata* subsp. malaccensis | 4-alpha-glucanotransferase | 65.711 | 18 | | 743 | 84 | 15 | QQLNDFRK  NELPESMDVEHVDFK | |
| Transport | | | | | | | | | | |
| M0TWL9 | *Musa acuminata* subsp. malaccensis | Serine hydroxymethyl transferase | 37.67 | 21 | | 438 | 48.1 | 4 | SGMIFYR  YSEGMPGNR | |
| M0T9G2 | *Musa acuminata* subsp. malaccensis | Serine hydroxymethyl transferase | 7.854 | 6 | | 520 | 57.2 | 3 | MGTPALTSR  YSEGYPGAR | |
| M0RK59 | *Musa acuminata* subsp. malaccensis | Serine hydroxymethyl transferase | 6.12 | 5 | | 380 | 41.4 | 2 | IGTPAMTTR  ILDISSITLNK | |
| M0T3H2 | *Musa acuminata* subsp. malaccensis | Patatin | 30.238 | 17 | | 413 | 45.5 | 7 | LITVLSIDGGGVR  LQELDGPDAR | |
| M0T234 | *Musa acuminata* subsp. malaccensis | Importin subunit alpha | 29.328 | 14 | | 545 | 60.4 | 6 | SPPIEEVIQSGVVPR  VAVDAEEGR | |
| M0TNC0 | *Musa acuminata* subsp. malaccensis | Obg-like ATPase | 25.792 | 16 | | 394 | 44.4 | 6 | VNVPDER  STLFNTLTK | |
| M0T1U4 | *Musa acuminata* subsp. malaccensis | Probable cytosolic iron-sulfur protein assembly protein CIA01 homolog | 9.325 | 7 | | 348 | 38.3 | 2 | DSLVDQPSYK  EGLIASGAADDAIR | |
| M0RP97 | *Musa acuminata* subsp. malaccensis | Clathrin light chain | 9.625 | 19 | | 321 | 35.1 | 2 | QNAILLEEK | |
| M0TD21 | *Musa acuminata* subsp. malaccensis | Glycylpeptide N-tetra decanoyl transferase | 4.61 | 5 | | 355 | 39.9 | 1 | AAAAAEGDGEVESLAR | |
| M0S2M7 | *Musa acuminata* subsp. malaccensis | Beta-adaptin-like protein | 5.059 | 2 | | 902 | 99.8 | 2 | DSQDPNPLIR  EAENIVER | |
| M0RSF3 | *Musa acuminata* subsp. malaccensis | AP-4 complex subunit epsilon | 6.318 | 2 | | 931 | 102.7 | 2 | SSAVDSYLR  IAEPDVPR | |
| M0U9J3 | *Musa acuminata* subsp. malaccensis | Protein transport protein SEC 23 | 7.743 | 4 | | 544 | 59.7 | 2 | DGLSSESVGR  ARPNVGVIAGPR | |
| M0SMA0 | *Musa acuminata* subsp. malaccensis | V-type proton ATPase subunit | 7.901 | 7 | | 255 | 28.9 | 2 | SNAFIEGVTHK  FNTPDLR | |
| M0TVN2 | *Musa acuminata* subsp. malaccensis | Protein YIPF | 4.154 | 9 | | 275 | 29.5 | 1 | VPPSASPPPVVPAVPAAAAAPAGSSR | |
| M0S5R3 | *Musa acuminata* subsp. malaccensis | Transmembrane 9 super family member | 4.156 | 2 | | 599 | 68.6 | 1 | EALGEVLNGDR | |
| M0RM60 | *Musa acuminata* subsp. malaccensis | ADP,ATP carrier protein | 4.319 | 2 | | 607 | 65.9 | 1 | SLDSQFSPLAK | |
| M0U500 | *Musa acuminata* subsp. malaccensis | Acyl-carrier protein | 8.623 | 11 | | 141 | 14.8 | 1 | QLALPENATVAGHSK | |
| M0RVE2 | *Musa acuminata* subsp. malaccensis | ALA-interacting subunit | 2.013 | 2 | | 351 | 39.1 | 1 | TAALPTFR | |
| M0RQG7 | *Musa acuminata* subsp. malaccensis | Ferritin | 3.032 | 3 | | 276 | 30.7 | 1 | IAEYVAQLR | |
| M0U9C7 | *Musa acuminata* subsp. malaccensis | Translocase of chloroplast | 3.473 | 4 | | 312 | 35.1 | 1 | SSTVNSILGER | |
| Stress response and defense | | | | | | | | | | |
| M0RUL9 | *Musa acuminata* subsp. malaccensis | Chorismate synthase | 6.114 | 4 | | 445 | 47.9 | 1 | MIEAIDAVR  DRHETELIAR | |
| M0RN83 | *Musa acuminata* subsp. malaccensis | Chorismate synthase | 5.334 | 4 | | 449 | 48.5 | 1 | MIEAIDAVR  DRQETDLIAR | |
| M0RUN0 | *Musa acuminata* subsp. malaccensis | Ubiquitin carboxyl-terminal hydrolase | 8.519 | 13 | | 235 | 25.9 | 2 | STASLDPFER | |
| M0SAH1 | *Musa acuminata* subsp. malaccensis | Ubiquitin carboxyl-terminal hydrolase | 1.6 | 4 | | 311 | 35.9 | 1 | GLAINNSEAIR | |
| M0STS9 | *Musa acuminata* subsp. malaccensis | Ferredoxin-NADP reductase,chloroplastic | 8.771 | 8 | | 381 | 42.4 | 3 | LYSIASTR  EPYTATIVSVER | |
| Nucleotide metabolism | | | | | | | | | | |
| M0TK48 | *Musa acuminata* subsp. malaccensis | Guanosine nucleotide diphosphate dissociation inhibitor | 18.647 | 12 | | 442 | 49.5 | 6 | LYSESLAR  VPATDMEALR | |
| M0SZJ0 | *Musa acuminata* subsp. malaccensis | Inosine-5’-monophosphate dehydrogenase | 20.071 | 10 | | 499 | 52.2 | 4 |  | |
| M0TUR1 | *Musa acuminata* subsp. malaccensis | Orotidine 5’-phosphate decarboxylase | 5.834 | 6 | | 387 | 41.6 | 2 | SDWEGLADR  YELEDGFPATR | |
| M0T3A3 | *Musa acuminata* subsp. malaccensis | GTP-binding nuclear protein | 12.706 | 6 | | 476 | 54.1 | 3 | NLQYYEISAK  LVLVGDGGTGK | |
| M0SN89 | *Musa acuminata* subsp. malaccensis | UMP-CMP kinase | 2.324 | 4 | | 201 | 23 | 1 | VDDNIETIR | |
| Lipid metabolism | | | | | | | | | | |
| M0RI96 | *Musa acuminata* subsp. malaccensis | 3-methyl-2-oxobutanoate hydroxymethyl transferase | 11.265 | 9 | | 310 | 32.9 | 2 | ISEADVDGFSNELQK  ALSQYKEEVENR | |
| M0SPH7 | *Musa acuminata* subsp. malaccensis | Non-specific lipid-transfer protein | 7.854 | 11 | | 119 | 12.1 | 1 | TAAAGLSGIDYGR | |
| M0U9H9 | *Musa acuminata* subsp. malaccensis | Dihydrolipoamide acetyltransferase component of pyruvate dehydrogenase | 3.237 | 2 | | 495 | 53.3 | 1 | SLSAISLEVK | |
| M0SDU5 | Musa acuminata subsp. malaccensis | Lipoxygenase | 49.574 | 14 | | 846 | 95 | 11 | RGMAVEDPAAEHGLK  IRELEDTTMYASR | |
| Cell division | | | | | | | | | | |
| M0SE30 | *Musa acuminata* subsp. malaccensis | Peptidyl-prolyl cis-trans isomerase | 14.239 | 23 | | 151 | 16 | 3 | VVEGLEVVK  AIEAVGSQSGTTK | |
| DNA replication | | | | | | | | | | |
| M0STG7 | *Musa acuminata* subsp. malaccensis | RuvB-like helicase | 3.609 | 3 | | 455 | 49.9 | 1 | ALLLAGPPSTGK | |
| M0RHP5 | *Musa acuminata* subsp. malaccensis | DNA gyrase subunit | 3.634 | 2 | | 727 | 81.1 | 1 | VPNPEFEGQTK | |
| RNA processing | | | | | | | | | | |
| M0T577 | *Musa acuminata* subsp. malaccensis | Ribonuclease | 27.762 | 8 | | 982 | 107.6 | 3 | SNHYDALLAAESR  IVLEGVDK | |
| M0RHK8 | *Musa acuminata* subsp. malaccensis | Ribonuclease | 18.778 | 6 | | 984 | 108 | 1 | VNLSSIR | |
| M0S5Z8 | *Musa acuminata* subsp. malaccensis | Eukaryotic translation initiation factor 3 subunit 1 | 26.97 | 21 | | 321 | 35.4 | 6 | SFSSGGEDGYVR  ILQEEIGGVK | |
| M0S626 | *Musa acuminata* subsp. malaccensis | Eukaryotic translation initiation factor 3 subunit 1 | 11.628 | 13 | | 230 | 25.9 | 2 | TSEIASEVLADPLAEK  EIASAVTAIANEK | |
| M0TZA7 | *Musa acuminata* subsp. malaccensis | Eukaryotic translation initiation factor 3 subunit 1 | 7.847 | 5 | | 411 | 46.5 | 2 | VVQQPTDRPALR  ALDLVASGK | |
| M0RN39 | *Musa acuminata* subsp. malaccensis | Eukaryotic translation initiation factor 3 subunit 1 | 7.496 | 3 | | 694 | 79.9 | 2 | AGSNTEVFWNDPR  KIYSQIGTIR | |
| M0RKH9 | *Musa acuminata* subsp. malaccensis | Eukaryotic translation initiation factor 3 subunit 1 | 6.738 | 4 | | 287 | 31.9 | 1 | VAGDPLAAMGK | |
| M0S2B1 | *Musa acuminata* subsp. malaccensis | Eukaryotic translation initiation factor 3 subunit 1 | 5.664 | 9 | | 231 | 26 | 2 | STAELFAK  EVASSVTAIANEK | |
| M0TAQ2 | *Musa acuminata* subsp. malaccensis | Eukaryotic translation initiation factor 3 subunit 1 | 5.204 | 3 | | 337 | 38.6 | 1 | QQAQQQAWLQK | |
| M0REE6 | *Musa acuminata* subsp. malaccensis | Eukaryotic translation initiation factor 3 subunit 1 | 4.569 | 2 | | 505 | 58.9 | 1 | SAITDVLER | |
| M0U4A5 | *Musa acuminata* subsp. malaccensis | Eukaryotic translation initiation factor 3 subunit 1 | 2.419 | 3 | | 293 | 32.3 | 1 | ISPAAFDK | |
| M0RJA1 | *Musa acuminata* subsp. malaccensis | Eukaryotic translation initiation factor 6 subunit 1 | 4.068 | 4 | | 245 | 26.6 | 1 | NSLPDQVVVQR | |
| M0SHJ9 | *Musa acuminata* subsp. malaccensis | Elongation factor Tu | 21.977 | 14 | | 455 | 49.1 | 1 | TGDDVEVLGLTQSGPLK  TADVTGKVELPENVK | |
| M0TJH0 | *Musa acuminata* subsp. malaccensis | Eukaryotic translation initiation factor 3 subunit | 7.862 | 3 | | 440 | 51.4 | 1 | NIVEPAQAAQATR | |
| M0U8R7 | *Musa acuminata* subsp. malaccensis | Alanine-t-RNA ligase | 23.797 | 8 | | 944 | 103.9 | 6 | SKAVGDSIVMDADATSK  LTSILQNK | |
| M0TQN9 | *Musa acuminata* subsp. malaccensis | Serine/threonine-protein phosphatase | 9.491 | 7 | | 322 | 36.5 | 1 | YGNANVWK  EVLMEESNVQPVK | |
| M0TXQ3 | *Musa acuminata* subsp. malaccensis | Reticulon-like protein | 6.655 | 7 | | 251 | 28.1 | 2 | SLTYEINR  ASVVAEAVK | |
| M0SMK6 | *Musa acuminata* subsp. malaccensis | Polyadenylate-binding protein | 4.235 | 1 | | 652 | 71.2 | 1 | VAEALEVLR | |
| M0TDW7 | *Musa acuminata* subsp. malaccensis | 5-formyltetra hydrofolate cyclo-ligase | 1.323 | 2 | | 292 | 32.3 | 1 | IVAEVLK | |
| M0RM50 | *Musa acuminata* subsp. malaccensis | Lysine-t-RNA ligase | 2.087 | 1 | | 615 | 69.7 | 1 | ELVVGGLDR | |
| Post-translational modification | | | | | | | | | | |
| M0TV01 | *Musa acuminata* subsp. malaccensis | 40S ribosomal protein SA | 27.894 | 14 | | 305 | 33.4 | 1 | HTPGTFTNQLQTSFSEPR | |
| M0UCA3 | *Musa acuminata* subsp. malaccensis | 40S ribosomal protein SA | 22.116 | 12 | | 340 | 37.1 | 1 | FAQYTGAHPIAGR | |
| M0RJJ1 | *Musa acuminata* subsp. malaccensis | 40S ribosomal protein S6 | 8.926 | 12 | | 249 | 28.3 | 3 | LSAASKPSIAA  KLEIDDDQKLR | |
| M0T8V4 | *Musa acuminata* subsp. malaccensis | 40S ribosomal protein S8 | 6.994 | 11 | | 217 | 24.4 | 2 | ILDVVYNASNNELVR | |
| M0TV01 | *Musa acuminata* subsp. malaccensis | 40S ribosomal protein S26 | 3.721 | 6 | | 157 | 18 | 1 | YVDIGIPANNK | |
| M0TR77 | *Musa acuminata* subsp. malaccensis | Annexin | 25.788 | 16 | | 316 | 35.9 | 7 | TADELFAAK  TADELFAAKR | |
| M0UBJ9 | *Musa acuminata* subsp. malaccensis | Dolichyl-disphosphooligosaccharide-protein glycosyl transferase 48kDa subunit | 18.267 | 13 | | 447 | 49.8 | 5 | SGNEQFVTEISK  VGETNEPSMYR | |
| Hormone regulation | | | | | | | | | | |
| M0SZJ0 | *Musa acuminata* subsp. malaccensis | Inosine-5’-monophosphate dehydrogenase | 20.071 | 18 | | 499 | 52.2 | 4 | SDWEGLADR  VAQGVVGAVADK | |
| M0RTL1 | *Musa acuminata* subsp. malaccensis | Inositol-trakisphosphate 1-kinase | 17.298 | 13 | | 317 | 35.7 | 3 | LQGDIQSLDVDLVK  AGSKPIIFDSLK | |
| M0SBF8 | *Musa acuminata* subsp. Malaccensis | Auxin-responsive protein | 5.002 | 3 | | 312 | 33.1 | 1 | GSDAIGIAPR | |
| M0TX77 | *Musa acuminata* subsp. malaccensis | Imidazole glycerol phosphate synthase hisHF | 1.981 | 2 | | 583 | 63.1 | 1 | DSGILDDIGR | |
| Histone modification | | | | | | | | | | |
| M0RV37 | *Musa acuminata* subsp. malaccensis | Histone H4 | 5.308 | 8 | | 150 | 16.4 | 1 | DNIQGITKPAIR | |
| M0SFI5 | *Musa acuminata* subsp. malaccensis | Histone H2A | 4.282 | 6 | | 150 | 15.8 | 1 | AGLQFPVGR | |
| M0SKP2 | *Musa acuminata* subsp. malaccensis | Histone deacetylase | 3.757 | 1 | | 664 | 73.8 | 1 | VGLIYDER | |
| Cell signaling | | | | | | | | | | |
| M0SN82 | *Musa acuminata* subsp. malaccensis | Mitogen-activated protein kinase | 3.511 | 2 | | 375 | 42.9 | 1 | IGNAFDNR | |
| M0REC5 | *Musa acuminata* subsp. malaccensis | Mitogen-activated protein kinase | 3.024 | 3 | | 382 | 43.9 | 1 | IANAFDNKIDAK | |
