# Supplementary material
Source: Research Square preprint supplement (doi:10.21203/rs.3.rs-9184162/v1)
Supplement: Supplementary file 2 [file 19a51c098596048d3b73f8a7.docx]

| Suppl. Table-1- Protein identified using orbitrap fusion mass spectrometry in banana fruit (peel) tissues at 90-DAF (days after flowering). | | | | | | | | | | |
| --- | --- | --- | --- | --- | --- | --- | --- | --- | --- | --- |
| Accession No./Protein ID | **Origin/Taxonomy** | **Protein description** | **Sum peptide score** | | **Coverage peptide** | **A.A** | **Protein molecular weight (KDa)** | **Unique Peptides** | | **Protein sequence** |
|  |  |  |  | |  |  |  |  | |  |
| Amino acid metabolism | | | | | | | | | | |
| M0U3I3 | *Musa acuminata* subsp. malaccensis | Cysteine synthase | | 55.063 | 41 | 324 | 33.9 | 4 | | LIVVVFPSFGER  IHYETTGPEIWK |
| M0RSL6 | *Musa acuminata* subsp. malaccensis | Cysteine synthase | | 36.013 | 22 | 324 | 23.11 | 4 | | LIVVVFPSFGER  TPNSYILQQFENPANPK |
| M0SQU8 | *Musa acuminata* subsp. malaccensis | Cysteine synthase | | 34.611 | 30 | 325 | 34.3 | 2 | | VDALVSGIGTGGTITGTGK |
| M0TWV0 | *Musa acuminata* subsp. malaccensis | Cysteine synthase | | 23.511 | 19 | 380 | 40.5 | 4 | | IGYSMIADAEQK |
| M0SJA4 | *Musa acuminata* subsp. malaccensis | Cysteine synthase | | 20.413 | 17 | 325 | 34.3 | 1 | | IGYSMIADAEEK |
| M0SZX7 | *Musa acuminata* subsp. malaccensis | Cysteine synthase | | 12.339 | 13 | 359 | 38.8 | 4 | | EATQLIGR  AFGANLVLTDPTK |
| M0T8H5 | *Musa acuminata* subsp. malaccensis | Aminomethyltransferase | | 16.848 | 11 | 413 | 44.8 | 3 | | SHNEILNSSGEK |
| M0SUJ7 | *Musa acuminata* subsp. malaccensis | Aminomethyltransferase | | 9.757 | 6 | 413 | 44.6 | 1 | | GGAIDDSVVTK |
| M0RXI9 | *Musa acuminata* subsp. malaccensis | Glycine cleavage system H | | 14.402 | 27 | 164 | 17.4 | 3 | | LTETPGLINTSPYEDGWMIK  VKPSDPSELNSLMGSK |
| M0SH72 | *Musa acuminata* subsp. malaccensis | Glycine cleavage system H | | 9.021 | 12 | 155 | 16.8 | 2 | | YADTHEWVK  FCEEEDAKH |
| M0U9P1 | *Musa acuminata* subsp. malaccensis | Glycine cleavage system H | | 1.265 | 6 | 164 | 17.5 | 1 | | VRPSDPSEVK |
| M0TBH2 | *Musa acuminata* subsp. malaccensis | Aspartate aminotransferase | | 10.614 | 8 | 459 | 50.9 | 4 | | LNLGVGAYR  LYENLSQK |
| M0SM28 | *Musa acuminata* subsp. malaccensis | Aspartate aminotransferase | | 36.375 | 27 | 421 | 46 | 2 | | RAEQLLVNDPSR  MFVADGGECLTAQSYAK |
| M0TKK3 | *Musa acuminata* subsp. malaccensis | Aspartate aminotransferase | | 32.808 | 24 | 424 | 46.4 | 1 | | QQLFDALR  RAEQLLVNDPSR |
| M0T713 | *Musa acuminata* subsp. malaccensis | Aspartate aminotransferase | | 16.341 | 13 | 429 | 47.8 | 4 | | VNVGVGAYR  IAAVQALSGTGACR |
| M0SM56 | *Musa acuminata* subsp. malaccensis | Amidase | | 5.799 | 3 | 656 | 72.4 | 2 | | SPSAYLNNPDAER |
| M0S713 | *Musa acuminata* subsp. malaccensis | Amidase | | 19.189 | 4 | 710 | 76.1 | 2 | | QDTVGPIGR  TVSDAVQVLEAIVGFDQR |
| M0T8Y9 | *Musa acuminata* subsp. malaccensis | Ketol-acid reductoisomerase | | 28.231 | 10 | 592 | 63.9 | 1 | | NTVECITGIISK  NISVIAVCPK |
| M0TKD3 | *Musa acuminata* subsp. malaccensis | Ketol-acid reductoisomerase | | 16.848 | 11 | 413 | 44.8 | 3 | | NTVECITGIISK  RLYVQGK |
| M0TEW6 | *Musa acuminata* subsp. malaccensis | Chorismate synthase | | 6.352 | 10 | 259 | 29.4 | 3 | | VDPAVVAR |
| Cell wall metabolism | | | | | | | | | | |
| M0TGN6 | *Musa acuminata* subsp. malaccensis | Pectinesterase | | 13.977 | 8 | 507 | 54.4 | | 3 | SATLAVVGEGFLAR  ETTVITGSR |
| M0SC42 | *Musa acuminata* subsp. malaccensis | Pectinesterase | | 47.816 | 22 | 401 | 42.8 | | 6 | DLTIENTAGPQGNQAVAFR |
| M0RPM3 | *Musa acuminata* subsp. malaccensis | Pectinesterase | | 18.594 | 7 | 566 | 62.1 | | 3 | AGAYLENVEVGK |
| M0U687 | *Musa acuminata* subsp. malaccensis | Pectate lyase | | 30.884 | 17 | 454 | 49.3 | | 6 | YLAPTNPFAK  YAVIQDVPLWITFK |
| M0TAX1 | *Musa acuminata* subsp. malaccensis | Pectate lyase | | 22.721 | 14 | 407 | 44.6 | | 5 | VMLLGHSDELTSDK |
| M0T2F6 | *Musa acuminata* subsp. malaccensis | Beta-hexosaminidase | | 2.191 | 2 | 550 | 62.1 | | 1 | GIAAAPVTNK |
| M0TTV0 | *Musa acuminata* subsp. malaccensis | Xyloglucan endotransglucosylase/hydrolase | | 19.9 | 21 | 286 | 32.6 | | 5 | SGQPYTVQTNVYAHGK |
| M0U6S4 | *Musa acuminata* subsp. malaccensis | Xyloglucan endotransglucosylase/hydrolase | | 15.646 | 19 | 289 | 32.9 | | 6 | YKVDYQYQPFVAR |
| M0TZC7 | *Musa acuminata* subsp. malaccensis | Xyloglucan endotransglucosylase/hydrolase | | 6.268 | 6 | 281 | 31.1 | | 2 | IVFYVDGTPVR |
| M0RMW1 | *Musa acuminata* subsp. malaccensis | Xyloglucan endotransglucosylase/hydrolase | | 5.691 | 8 | 282 | 31.8 | | 2 | AYASLWDADDWATR |
| M0TLF4 | *Musa acuminata* subsp. malaccensis | Alpha-mannosidase | | 60.313 | 13 | 1077 | 120.9 | | 11 | QHVANDYAK  IPVVSDSVLVLDHEGK |
| M0TWG0 | *Musa acuminata* subsp. malaccensis | Alpha-mannosidase | | 10.611 | 4 | 1108 | 124.7 | | 3 | VNALYSTPSIYTDAK |
| M0U935 | *Musa acuminata* subsp. malaccensis | Alpha-mannosidase | | 7.412 | 3 | 1008 | 113.4 | | 3 | ETNLSANQNK |
| M0S9W4 | *Musa acuminata* subsp. malaccensis | Beta-galactosidase | | 4.564 | 2 | 878 | 97.9 | | 1 | LCEPALVAVDDAPQYVK |
| M0RVL3 | *Musa acuminata* subsp. malaccensis | Beta-galactosidase | | 1.734 | 1 | 817 | 90.9 | | 1 | SITVDTISVAR |
| M0SQP6 | *Musa acuminata* subsp. malaccensis | Beta-galactosidase | | 16.46 | 4 | 871 | 95.4 | | 3 | LVLFEEMSGDPTQISFATR |
| M0SX47 | *Musa acuminata* subsp. malaccensis | Beta-galactosidase | | 10.494 | 3 | 644 | 72.6 | | 2 | TAAALENILSR |
| M0SNJ6 | *Musa acuminata* subsp. malaccensis | Peroxidase | | 1.488 | 3 | 309 | 33.8 | | 1 | GFEVIDEIK |
| M0TCA6 | *Musa acuminata* subsp. malaccensis | Peroxidase | | 118.132 | 68 | 249 | 27.3 | | 7 | SGFEGAWTSNPLIFDNSYFK |
| M0SWF7 | *Musa acuminata* subsp. malaccensis | Peroxidase | | 110.186 | 61 | 249 | 27.4 | | 6 | NCAPIMLR  YAADEDAFFADYAEAHLK |
| M0THT5 | *Musa acuminata* subsp. malaccensis | Peroxidase | | 54.262 | 33 | 249 | 27.3 | | 2 | TGGPFGTIR |
| M0T710 | *Musa acuminata* subsp. malaccensis | Peroxidase | | 45.534 | 37 | 264 | 28.2 | | 7 | SVMAQVVGQDPR |
| M0RUU7 | *Musa acuminata* subsp. malaccensis | Peroxidase | | 45.12 | 29 | 296 | 31.4 | | 5 | DSVVILGGPNWDVK |
| M0RVD5 | *Musa acuminata* subsp. malaccensis | Peroxidase | | 28.311 | 17 | 361 | 39 | | 4 | SIIWNHVSSNSELPAK |
| M0TBJ2 | *Musa acuminata* subsp. malaccensis | Peroxidase | | 26.428 | 5 | 1208 | 129.2 | | 3 | QALSNINSLR |
| M0U174 | *Musa acuminata* subsp. malaccensis | Xylose isomerase | | 12.471 | 6 | 544 | 60.9 | | 2 | TLAETNANLDEVVALAK |
| M0TX33 | *Musa acuminata* subsp. malaccensis | t-SNARE protein | | 7.666 | 3 | 488 | 54 | | 1 | TSGLDNQGIVALQR |
| M0S500 | *Musa acuminata* subsp. malaccensis | t-SNARE protein | | 6.109 | 11 | 122 | 14 | | 1 | AALFDGIEEGGIR |
| M0TCL9 | *Musa acuminata* subsp. malaccensis | t-SNARE protein | | 5.574 | 6 | 233 | 26.2 | | 1 | TAGLDNQGIVGLQR |
| M0T9A4 | *Musa acuminata* subsp. malaccensis | t-SNARE protein | | 4.21 | 6 | 267 | 30.2 | | 2 | LLEEVPK |
| M0S615 | *Musa acuminata* subsp. malaccensis | t-SNARE protein | | 3.851 | 6 | 270 | 30.3 | | 2 | ELNSYVALR |
| Carbon metabolism | | | | | | | | | | |
| M0SR05 | *Musa acuminata* subsp. malaccensis | Malate dehydrogenase | | 112.047 | 42 | 332 | 35.5 | | 14 | NVIIWGNHSSTQYPDVSHATVK |
| M0SM75 | *Musa acuminata* subsp. malaccensis | Malate dehydrogenase | | 94.447 | 48 | 402 | 44 | | 7 | RTQDGGTEVVEAK |
| M0U880 | *Musa acuminata* subsp. malaccensis | Malate dehydrogenase | | 45.495 | 24 | 348 | 36.3 | | 2 | RTQDGGTEVVEAK |
| M0SUX9 | *Musa acuminata* subsp. malaccensis | Malate dehydrogenase | | 15.884 | 13 | 356 | 37.4 | | 1 | DDLFNINAGIVK |
| Cell cycle/division | | | | | | | | | | |
| M0SRX6 | *Musa acuminata* subsp. malaccensis | cyclin dependent kinase | | 15.323 | 7 | 553 | 63 | | 3 | IPQASSEGPEAR  VYDGDMIVLQGQEK |
| Fatty acid metabolism | | | | | | | | | | |
| M0SMH7 | *Musa acuminata* subsp. malaccensis | Biotin carboxylase | | 18.52 | 10 | 531 | 58 | | 5 | LLEEAPSPALSPELR  LILNVEDFR |
| M0SDU5 | *Musa acuminata* subsp. malaccensis | Lipoxygenases | | 14.2 | 5 | 846 | 95 | | 3 | THCCVEPYIIAANR  LDPNIYGPPESLITEELIER |
| M0SM56 | *Musa acuminata* subsp. malaccensis | Neutral ceramidase | | 5.799 | 3 | 656 | 72.4 | | 2 | SPSAYLNNPDAER |
| TCA cycle | | | | | | | | | |  |
| M0S7D7 | *Musa acuminata* subsp. malaccensis | Succinate-CoA ligase | | 11.635 | 12 | 341 | 35.5 | | 2 | MGHAGAIVSGGK |
| M0TQN5 | *Musa acuminata* subsp. malaccensis | Succinate-CoA ligase | | 7.517 | 7 | 364 | 38.2 | | 1 | MGHAGAIVSGGK |
| M0TRQ8 | *Musa acuminata* subsp. malaccensis | Succinate-CoA ligase | | 32.236 | 16 | 421 | 45 | | 6 | LNFDDNAAFR |
| M0RPI3 | *Musa acuminata* subsp. malaccensis | Succinate-CoA ligase | | 26.845 | 12 | 608 | 65.9 | | 6 | SEVQFGHAGAK |
| M0RQK4 | *Musa acuminata* subsp. malaccensis | Succinate dehydrogenase | | 4.589 | 7 | 283 | 31.6 | | 2 | IKNEIDPSLTFR |
| M0TDM1 | *Musa acuminata* subsp. malaccensis | Succinate dehydrogenase | | 28.246 | 11 | 599 | 65.8 | | 4 | AFGGQSLDFGK |
| M0RI43 | *Musa acuminata* subsp. malaccensis | Citrate synthase | | 23.126 | 12 | 476 | 52.4 | | 6 | IYDPGYLNTAPVR |
| M0SQ89 | *Musa acuminata* subsp. malaccensis | Citrate synthase | | 13.269 | 10 | 489 | 54.9 | | 4 | YFGLSEAR  ECGEDITTDQLK |
| M0SCK2 | *Musa acuminata* subsp. malaccensis | Dihydrolipoamide acetyltransferase | | 12.467 | 7 | 407 | 42.4 | | 2 | ITPSDIEAAVGIQPK |
| M0U9H9 | *Musa acuminata* subsp. malaccensis | Dihydrolipoamide acetyltransferase | | 8.223 | 8 | 495 | 53.3 | | 2 | VVEPVIGIDGVEKPAVITK |
| Signal transduction | | | | | | | | | | |
| M0TQK4 | *Musa acuminata* subsp. malaccensis | Nucleoside diphosphate kinase | | 32.441 | 41 | 148 | 16.5 | | 3 | NVIHGSDSIESAR |
| M0SZK9 | *Musa acuminata* subsp. malaccensis | Nucleoside diphosphate kinase | | 30.453 | 47 | 148 | 163 | | 1 | IIGATNPADSAPGTIR |
| M0RUN9 | *Musa acuminata* subsp. malaccensis | Nucleoside diphosphate kinase | | 17.476 | 37 | 142 | 15.6 | | 2 | GDLAIEIGR  GLVGEIIGR |
| M0U940 | *Musa acuminata* subsp. malaccensis | Nucleoside diphosphate kinase | | 13.063 | 15 | 234 | 25.7 | | 3 | KLIGATNPLQAEPGTIR |
| M0SS87 | *Musa acuminata* subsp. malaccensis | Tubulin | | 12.339 | 13 | 359 | 38.8 | | 4 | VNVYYNEASGGR |
| M0S1G7 | *Musa acuminata* subsp. malaccensis | Tubulin | | 8.637 | 24 | 112 | 12.6 | | 3 | QQENVLAESR  GADPYDLK |
| M0S7D0 | *Musa acuminata* subsp. malaccensis | Tubulin | | 30.307 | 15 | 450 | 49.6 | | 6 | TVQFVDWCPTGFK  DVNAAVATIK |
| M0T458 | *Musa acuminata* subsp. malaccensis | Tubulin | | 17.199 | 11 | 423 | 47.1 | | 1 | AVLVDLEPGTMDAVR  LAVNLIPFPR |
| M0SCM5 | *Musa acuminata* subsp. malaccensis | Annexin | | 3.768 | 4 | 269 | 30.1 | | 1 | DAIHSETSGHYR |
| M0TR77 | *Musa acuminata* subsp. malaccensis | Annexin | | 32.891 | 31 | 316 | 35.9 | | 10 | MGTDEGSLTR |
| Stress, defense response/redox mechanism | | | | | | | | | |  |
| M0S4H9 | *Musa acuminata* subsp. malaccensis | Superoxide dismutase | | 51.653 | 51 | 152 | 15.2 | | 4 | VDNQIPLSGPNSIIGR |
| M0SFL6 | *Musa acuminata* subsp. malaccensis | Superoxide dismutase | | 23.278 | 21 | 243 | 26.6 | | 3 | LLVEATANQDPLVTK |
| M0TEF8 | *Musa acuminata* subsp. malaccensis | Superoxide dismutase | | 23.088 | 21 | 152 | 15 | | 1 | AVVVHADPDDLGK |
| M0RG01 | *Musa acuminata* subsp. malaccensis | Superoxide dismutase | | 22.21 | 29 | 216 | 22 | | 3 | GGHELSLTTGNAGGR |
| M0U200 | *Musa acuminata* subsp. malaccensis | Superoxide dismutase | | 18.266 | 12 | 229 | 23.5 | | 1 | ALVVHELEDDLGK |
| M0S978 | *Musa acuminata* subsp. malaccensis | Superoxide dismutase | | 8.924 | 13 | 245 | 26.8 | | 3 | LTVETTANQDPLVTK |
| M0TSD8 | *Musa acuminata* subsp. malaccensis | Superoxide dismutase | | 6.853 | 10 | 238 | 26.3 | | 2 | GDASAVVR |
| M0RP81 | *Musa acuminata* subsp. malaccensis | Glutathione peroxidase | | 18.678 | 30 | 168 | 18.5 | | 4 | SAASIHDFTVK  DVDLSMYK |
| M0SS86 | *Musa acuminata* subsp. malaccensis | Glutathione peroxidase | | 9.313 | 27 | 168 | 18.7 | | 4 | FLVDKDGR  FKAEYPIFDK |
| M0UBI2 | *Musa acuminata* subsp. malaccensis | Tyrosinase | | 112.885 | 43 | 588 | 66.8 | | 8 | RPAHLVKDDQEYMDK  LIDDDTFTIPFWNWDTK |
| M0UBI1 | *Musa acuminata* subsp. malaccensis | Tyrosinase | | 52.564 | 27 | 452 | 52.1 | | 1 | RPAHLVKDDQEYMDK |
| M0SAT8 | *Musa acuminata* subsp. malaccensis | Formate dehydrogenase | | 84.731 | 51 | 383 | 42.1 | | 14 | LKPFNCNLLYYDR |
| M0U4X1 | *Musa acuminata* subsp. malaccensis | Germin-like proteins | | 73.156 | 25 | 234 | 25.1 | | 5 | LPGLNTLGVAMSR |
| M0S2X3 | *Musa acuminata* subsp. malaccensis | Germin-like proteins | | 30.536 | 23 | 219 | 22.9 | | 2 | IPGLNTLGVSMSR |
| M0SZM3 | *Musa acuminata* subsp. malaccensis | Germin-like proteins | | 25.779 | 20 | 219 | 23 | | 1 | IPGLNTLGVSMSR  VDYAPGGLNPPHTHPR |
| M0U0R8 | *Musa acuminata* subsp. malaccensis | Germin-like proteins | | 9.108 | 5 | 256 | 27.1 | | 1 | DVSHVTTNDFVFK |
| M0UCZ2 | *Musa acuminata* subsp. malaccensis | Germin-like proteins | | 6.241 | 12 | 145 | 15.6 | | 1 | DPTNVTPDDFYISGLDK |
| M0TWM0 | *Musa acuminata* subsp. malaccensis | AdoHcyase | | 70.465 | 40 | 425 | 46.4 | | 14 | NNAIVCNIGHFDNEIDMHGLETYPGVK |
| M0T386 | *Musa acuminata* subsp. malaccensis | Barwin domain protein | | 69.582 | 73 | 145 | 15.6 | | 1 | IVDQCANGGLDLDQGVFSQLDTDGGGYNR |
| M0RRG7 | *Musa acuminata* subsp. malaccensis | Aldehyde dehydrogenase | | 6.564 | 5 | 493 | 53.4 | | 2 | SFAPTLVDAMK |
| M0RX69 | *Musa acuminata* subsp. malaccensis | Isocitrate dehydrogenase | | 57.642 | 31 | 410 | 45.8 | | 10 | SEGGYVWACK  LIFPFVDLDIK |
| M0UAU8 | *Musa acuminata* subsp. malaccensis | Isocitrate dehydrogenase | | 12.559 | 11 | 367 | 40.2 | | 3 | TESFLTWESLESVR |
| M0TQW7 | *Musa acuminata* subsp. malaccensis | Thioredoxin | | 54.338 | 32 | 484 | 51.3 | | 13 | TESFLTWESLESVR |
| M0T818 | *Musa acuminata* subsp. malaccensis | Thioredoxin | | 45 | 7 | 267 | 29.3 | | 2 | LNTEILGVSVDSVFSHLAWVQTDR |
| M0SR53 | *Musa acuminata* subsp. malaccensis | Thioredoxin | | 32.367 | 58 | 114 | 12.8 | | 5 | VDVDELKPVAEDWAIEAMPTFIFLK |
| M0UCA4 | *Musa acuminata* subsp. malaccensis | Thioredoxin | | 29.294 | 17 | 213 | 23.5 | | 4 | LPFTLLSDEGNK |
| M0SXT9 | *Musa acuminata* subsp. malaccensis | Thioredoxin | | 7.514 | 7 | 246 | 26.6 | | 1 | LNTDENPDIATQYGIR |
| M0UD03 | *Musa acuminata* subsp. malaccensis | Thioredoxin | | 4.611 | 7 | 222 | 24.8 | | 2 | SIIDPLLER |
| M0STB1 | *Musa acuminata* subsp. malaccensis | Thioredoxin | | 4.112 | 8 | 237 | 25.2 | | 1 | DAVIGAVPESTLITSIEK |
| M0U4S1 | *Musa acuminata* subsp. malaccensis | Thioredoxin | | 3.923 | 7 | 134 | 15.3 | | 1 | IDGFVQSFR |
| M0S8V2 | *Musa acuminata* subsp. malaccensis | Thioredoxin | | 1.59 | 7 | 114 | 12.8 | | 1 | FTDAIFLR |
| M0SEK3 | *Musa acuminata* subsp. malaccensis | Catalase | | 49.265 | 21 | 492 | 57.1 | | 5 | QNDFKQPGER |
| M0TQ39 | *Musa acuminata* subsp. malaccensis | Catalase | | 39.53 | 20 | 492 | 57.2 | | 6 | ENNFKQPGER |
| M0S0R3 | *Musa acuminata* subsp. malaccensis | Catalase | | 9.662 | 34 | 112 | 13.4 | | 3 | QNDFKQPGER |
| M0S1S4 | *Musa acuminata* subsp. malaccensis | Small heat shock proteins | | 42.109 | 53 | 156 | 17.8 | | 5 | SLSETRPGFASETSAFANTR |
| M0TUL3 | *Musa acuminata* subsp. malaccensis | Small heat shock proteins | | 23.015 | 24 | 200 | 22.5 | | 4 | VVSIAGGDDAGDKEK |
| M0TCH9 | *Musa acuminata* subsp. malaccensis | Small heat shock proteins | | 10.446 | 27 | 165 | 18.7 | | 2 | ETPEAHVFTADLPGLR |
| M0RK37 | *Musa acuminata* subsp. malaccensis | Small heat shock proteins | | 18.103 | 34 | 161 | 17.6 | | 5 | RGPDGEDGKDGGVK |
| M0TWA8 | *Musa acuminata* subsp. malaccensis | Small heat shock proteins | | 14.093 | 32 | 157 | 18 | | 1 | SLSETRPSFVSDASAFANTR |
| M0RIT9 | *Musa acuminata* subsp. malaccensis | Small heat shock proteins | | 10.513 | 19 | 194 | 21.9 | | 4 | RGVAPSAPLGLWDR |
| M0S0L4 | *Musa acuminata* subsp. malaccensis | Small heat shock proteins | | 5.81 | 10 | 219 | 24.6 | | 2 | ASKPQQSQPLLK |
| M0RMR1 | *Musa acuminata* subsp. malaccensis | Small heat shock proteins | | 5.175 | 9 | 216 | 24 | | 2 | VWAEHNTLVIK |
| M0TMB5 | *Musa acuminata* subsp. malaccensis | Small heat shock proteins | | 4.277 | 8 | 195 | 22.2 | | 1 | TSVDWFETDSEYVLK |
| M0THM8 | *Musa acuminata* subsp. malaccensis | Small heat shock proteins | | 4.172 | 12 | 168 | 18.6 | | 2 | KDELKVEVEDGR |
| M0RH79 | *Musa acuminata* subsp. malaccensis | Small heat shock proteins | | 3.447 | 5 | 191 | 21.5 | | 1 | AVDALALAR |
| M0TX63 | *Musa acuminata* subsp. malaccensis | Small heat shock proteins | | 1.364 | 9 | 160 | 17.9 | | 1 | FRLPENAK |
| M0S2B1 | *Musa acuminata* subsp. malaccensis | Eukaryotic translation initiation factor (eIF) | | 19.511 | 22 | 231 | 26 | | 2 | SENDFLEYAELLSHK |
| M0S626 | *Musa acuminata* subsp. malaccensis | Eukaryotic translation initiation factor (eIF) | | 12.739 | 16 | 230 | 25.9 | | 2 | TSEIASEVLADPLAEK |
| M0RJA1 | *Musa acuminata* subsp. malaccensis | Eukaryotic translation initiation factor (eIF) | | 5.404 | 4 | 245 | 26.6 | | 1 | NSLPDQVVVQR |
| M0RKH9 | *Musa acuminata* subsp. malaccensis | Eukaryotic translation initiation factor (eIF) | | 4.257 | 4 | 287 | 31.9 | | 1 | VAGDPLAAMGK |
| M0T4C3 | *Musa acuminata* subsp. malaccensis | Eukaryotic translation initiation factor (eIF) | | 3.715 | 3 | 293 | 32.3 | | 1 | YVDDVVEGR |
| M0RN39 | *Musa acuminata* subsp. malaccensis | Eukaryotic translation initiation factor (eIF) | | 2.91 | 2 | 694 | 79.9 | | 1 | VSLVQIPGKEELR |
| M0T7M2 | *Musa acuminata* subsp. malaccensis | Eukaryotic translation initiation factor (eIF) | | 35.163 | 27 | 159 | 17.4 | | 2 | KLEDIVPSSHNCDVPHVTR |
| M0S5Z8 | *Musa acuminata* subsp. malaccensis | Eukaryotic translation initiation factor (eIF) | | 34.611 | 30 | 325 | 34.3 | | 2 | SFSSGGEDGYVR |
| M0U903 | *Musa acuminata* subsp. malaccensis | Eukaryotic translation initiation factor (eIF) | | 3.673 | 5 | 337 | 38.3 | | 2 | ENNPDLAGDR |
| M0RKE2 | *Musa acuminata* subsp. malaccensis | Peroxiredoxin | | 32.67 | 60 | 121 | 13.3 | | 4 | VANIEEGGAFTISGAEEILK |
| M0TP05 | *Musa acuminata* subsp. malaccensis | Peroxiredoxin | | 26.653 | 27 | 197 | 21.3 | | 5 | WSAYVDDGKIK |
| M0RH93 | *Musa acuminata* subsp. malaccensis | Peroxiredoxin | | 13.096 | 19 | 230 | 24.2 | | 4 | LPDATLSYFGADGELK |
| M0RYV2 | *Musa acuminata* subsp. malaccensis | Glutathione reductase | | 19.347 | 10 | 488 | 52.8 | | 4 | LIDAHLVEVTQADGTTK |
| M0SIV0 | *Musa acuminata* subsp. malaccensis | Glutathione reductase | | 2.239 | 3 | 559 | 60.5 | | 1 | GIEFHTEETPQAILK |
| M0RNM6 | *Musa acuminata* subsp. malaccensis | Lactoylglutathione lyase | | 19.014 | 23 | 233 | 26.2 | | 4 | EAPSNNPGLHTQLDDATK |
| M0U4F0 | *Musa acuminata* subsp. malaccensis | Lactoylglutathione lyase | | 3.327 | 3 | 383 | 42.7 | | 1 | ITACLDPDGWK |
| M0S2Q5 | *Musa acuminata* subsp. malaccensis | Glutaredoxin | | 2.402 | 9 | 106 | 11.3 | | 1 | TVPNVFIGGK |
| M0TET9 | *Musa acuminata* subsp. malaccensis | Glutaredoxin | | 1.963 | 8 | 126 | 13.8 | | 1 | TVPQVFIQGK |
| M0SYF0 | *Musa acuminata* subsp. malaccensis | Glutaredoxin | | 12.332 | 11 | 325 | 35.2 | | 3 | NVQLTVPLEQLIDR |
| M0RHJ4 | *Musa acuminata* subsp. malaccensis | Rubredoxin | | 1.913 | 5 | 169 | 18.3 | | 1 | DCGYIYNDR |
| Hormonal regulation | | | | | | | | | | |
| M0T8H5 | *Musa acuminata* subsp. malaccensis | Aminomethyl transferase | | 16.848 | 11 | 413 | 44.8 | | 3 | SHNEILNSSGEK  SGLHKPGTEVK |
| M0SUJ7 | *Musa acuminata* subsp. malaccensis | Aminomethyl transferase | | 9.757 | 6 | 413 | 44.6 | | 1 | GGAIDDSVVTK |
| Carbohydrate and Sugar metabolism | | | | | | | | | | |
| M0U300 | *Musa acuminata* subsp. malaccensis | UTP-glucose-1-phosphate uridylyltransferase | | 122.874 | 57 | 467 | 51.3 | | 22 | IQTPTDEVVVPYDTLSPPPEDLEATK |
| M0SU22 | *Musa acuminata* subsp. malaccensis | Alpha-1,4-glucan-phosphorylase | | 191.973 | 50 | 927 | 104.7 | | 36 | QAYYLSMEFLQGR  QDVFNSFYK |
| M0TCH7 | *Musa acuminata* subsp. malaccensis | Alpha-1,4-glucan-phosphorylase | | 171.66 | 46 | 838 | 95 | | 25 | SELFADFFSIWPTK |
| M0SA45 | *Musa acuminata* subsp. malaccensis | 4-alpha-glucanotransferase | | 58.103 | 20 | 743 | 84 | | 13 | MNIPATQLGNWK |
| M0SSK3 | *Musa acuminata* subsp. malaccensis | Phosphoribulokinase | | 17.187 | 15 | 405 | 44.9 | | 3 | RLTSVFGGAAEPPK |
| M0SVE5 | *Musa acuminata* subsp. malaccensis | Phosphoribulokinase | | 12.215 | 13 | 442 | 49.6 | | 2 | EGVAVDKPIYNHVTGLLDPPELINPPK |
| Protein folding | | | | | | | | | | |
| M0SZW5 | *Musa acuminata* subsp. malaccensis | Proteasome subunit alpha | | 18.294 | 28 | 235 | 25.6 | | 6 | NIEIGIIGADRK |
| M0S437 | *Musa acuminata* subsp. malaccensis | Proteasome subunit alpha | | 16.387 | 19 | 221 | 24.4 | | 1 | SPSPLLLPAK |
| M0RQ47 | *Musa acuminata* subsp. malaccensis | Proteasome subunit alpha | | 15.228 | 14 | 249 | 27.1 | | 2 | LTVEDPVTVEYITR |
| M0RST6 | *Musa acuminata* subsp. malaccensis | Proteasome subunit alpha | | 14.329 | 20 | 221 | 24.3 | | 1 | DAVTPLLESEAVDLVK |
| M0RSD5 | *Musa acuminata* subsp. malaccensis | Proteasome subunit alpha | | 9.813 | 10 | 252 | 28.4 | | 2 | ITDEGVTISQPYALK |
| M0TJG5 | *Musa acuminata* subsp. malaccensis | Proteasome subunit alpha | | 8.113 | 7 | 229 | 25.4 | | 1 | AAAIGANNQAAQSMLK |
| M0SMM1 | *Musa acuminata* subsp. malaccensis | Proteasome subunit alpha | | 7.696 | 8 | 249 | 27.2 | | 2 | AVDNSGTVIGIK |
| M0SKA6 | *Musa acuminata* subsp. malaccensis | Proteasome subunit alpha | | 6.062 | 15 | 204 | 22.8 | | 2 | DCLSGWGGHVLLVTPTEVQER |
| M0SJU7 | *Musa acuminata* subsp. malaccensis | Proteasome subunit alpha | | 2.986 | 4 | 267 | 29.6 | | 1 | TMDSTSLTSEK |
| M0T377 | *Musa acuminata* subsp. malaccensis | ClP proteolytic subunit protein | | 3.034 | 5 | 220 | 24.2 | | 1 | GAESDVMGLLLR |
| M0S0K5 | *Musa acuminata* subsp. malaccensis | Protein disulphide isomerase | | 87.077 | 34 | 507 | 56.3 | | 15 | NINFLIGDLDASQGAFQYFGLK |
| M0SGS3 | *Musa acuminata* subsp. malaccensis | Protein disulphide isomerase | | 38.747 | 21 | 514 | 57.3 | | 9 | SDYDFGHTSNAK |
| M0RG03 | *Musa acuminata* subsp. malaccensis | Carboxypeptidase | | 24.476 | 14 | 466 | 51.4 | | 4 | ADLLFVDNPVGTGYSFVEDESLFVK |
| M0SD18 | *Musa acuminata* subsp. malaccensis | Carboxypeptidase | | 17.557 | 11 | 492 | 54 | | 4 | ALVLIDSFLHGLQLPA |
| M0RNM5 | *Musa acuminata* subsp. Malaccensis | Carboxypeptidase | | 5.452 | 2 | 507 | 56.2 | | 1 | IAGNANYYDIR |
| M0SBM2 | *Musa acuminata* subsp. malaccensis | Carboxypeptidase | | 4.21 | 4 | 375 | 40.9 | | 1 | LGEPSDASNTVYTR |
| M0SBM4 | *Musa acuminata* subsp. malaccensis | Carboxypeptidase | | 3.934 | 3 | 398 | 42.8 | | 1 | GTIIDSGTTITR |
| M0RZQ7 | *Musa acuminata* subsp. malaccensis | Cyclophilin | | 54.028 | 31 | 391 | 42.9 | | 8 | IVLDGYNAPVTAGNFLDLVER |
| M0S116 | *Musa acuminata* subsp. malaccensis | Cyclophilin | | 28.69 | 31 | 129 | 13.5 | | 2 | IVMELYADVTPK |
| M0TRT3 | *Musa acuminata* subsp. malaccensis | Peptidyl prolyl cis-trans isomerase | | 11.822 | 29 | 118 | 12.8 | | 2 | GQMQKPFEEATYALK |
| M0TN92 | *Musa acuminata* subsp. malaccensis | Peptidyl prolyl cis-trans isomerase | | 7.151 | 10 | 224 | 23.3 | | 2 | VVGSGPEATQGQLIK |
| M0SVY4 | *Musa acuminata* subsp. malaccensis | Peptidyl prolyl cis-trans isomerase | | 6.923 | 15 | 121 | 13.2 | | 2 | DPGQQPFTFK |
| M0RFP2 | *Musa acuminata* subsp. malaccensis | Peptidyl prolyl cis-trans isomerase | | 5.805 | 3 | 562 | 62.8 | | 1 | EGEGYDHPNEGAVVTVK |
| M0TIB9 | *Musa acuminata* subsp. malaccensis | Peptidyl prolyl cis-trans isomerase | | 2.002 | 4 | 209 | 22.4 | | 1 | GGESIYGSK |
| M0T7K6 | *Musa acuminata* subsp. malaccensis | Peptidyl prolyl cis-trans isomerase | | 28.749 | 21 | 271 | 29.3 | | 4 | IVIGLYGDDVPQTAENFR |
| M0S9V6 | *Musa acuminata* subsp. malaccensis | Peptidyl prolyl cis-trans isomerase | | 25.91 | 27 | 249 | 26.8 | | 6 | LIESQETDRGDRPK |
| M0U5Q9 | *Musa acuminata* subsp. malaccensis | Peptidyl prolyl cis-trans isomerase | | 22.595 | 11 | 581 | 64.7 | | 6 | LQDGTVFVK |
| M0SE30 | *Musa acuminata* subsp. malaccensis | Peptidyl prolyl cis-trans isomerase | | 19.601 | 38 | 151 | 16 | | 5 | AIEAVGSQSGTTK |
| M0TJW5 | *Musa acuminata* subsp. malaccensis | Peptidyl prolyl cis-trans isomerase | | 16.263 | 25 | 152 | 16.1 | | 3 | GDPIEFELGSGQVIK |
| Nitrogen metabolism | | | | | | | | | | |
| M0STN9 | *Musa acuminata* subsp. malaccensis | Glutamate decarboxylase | | 32 | 13 | 489 | 55.2 | | 11 | NYVDMDEYPVTTELQNR |
| M0TST4 | *Musa acuminata* subsp. malaccensis | Glutamate decarboxylase | | 32.648 | 20 | 474 | 53.2 | | 6 | NYVDMDEYPVTTELQNR |
| M0S7X3 | *Musa acuminata* subsp. malaccensis | NmrA domain protein | | 101.161 | 75 | 312 | 34 | | 15 | QIQEAPIPLNVMLSICHSAFVK |
| M0SL13 | *Musa acuminata* subsp. malaccensis | NmrA domain protein | | 10.467 | 11 | 396 | 43.6 | | 4 | MGSQVLVPFR |
| Ethylene biosynthesis | | | | | | | | | | |
| M0RP52 | *Musa acuminata* subsp. malaccensis | Tetratricopeptide repeat (TPR) | | 46.821 | 30 | 456 | 51.6 | | 4 | QVLIDFQENPK |
| M0SR13 | *Musa acuminata* subsp. malaccensis | Tetratricopeptide repeat (TPR) | | 46.595 | 16 | 400 | 43.5 | | 5 | MGDPSVEVTDENRDVSQEAK |
| M0RUB6 | *Musa acuminata* subsp. malaccensis | Tetratricopeptide repeat (TPR) | | 42.771 | 22 | 502 | 56.8 | | 3 | NPNNINMYLSDPR |
| M0TPL8 | *Musa acuminata* subsp. malaccensis | Tetratricopeptide repeat (TPR) | | 41.195 | 23 | 518 | 58.5 | | 3 | ELEQQEYFDPK |
| M0SYH8 | *Musa acuminata* subsp. malaccensis | Tetratricopeptide repeat (TPR) | | 28.614 | 22 | 283 | 32.1 | | 3 | DATAALEINPDSAK |
| M0S4E6 | *Musa acuminata* subsp. malaccensis | Tetratricopeptide repeat (TPR) | | 3.368 | 4 | 228 | 25.6 | | 1 | TGQYEDALLK |
| M0T0C8 | *Musa acuminata* subsp. malaccensis | S-adenosylmethionine synthetase | | 24.931 | 20 | 396 | 43.3 | | 6 | NIGFVSDEVGLDADR |
| Starch biosynthesis | | | | | | | | | | |
| M0SU22 | *Musa acuminata* subsp. malaccensis | Alpha-1,4-glucan-phosphorylase | | 191.973 | 50 | 927 | 104.7 | | 36 | QAYYLSMEFLQGR  QDVFNSFYK |
| M0TCH7 | *Musa acuminata* subsp. malaccensis | Alpha-1,4-glucan-phosphorylase | | 171.66 | 46 | 838 | 95 | | 25 | SELFADFFSIWPTK |
| M0SWP2 | *Musa acuminata* subsp. malaccensis | Alpha-amylase | | 1.75 | 2 | 447 | 50.1 | | 1 | TDIGFDGWR |
| Antioxidant | | | | | | | | | | |
| M0SRM5 | *Musa acuminata* subsp. malaccensis | GFO_IDH_MocA protein | | 67.566 | 52 | 366 | 39.7 | | 14 | NEAGVILSCGSSLLWEDGK |
| Flavanoid biosynthesis | | | | | | | | | | |
| M0RQJ5 | *Musa acuminata* subsp. malaccensis | Polyketide synthases | | 3.832 | 4 | 330 | 35.2 | | 1 | LEAASINPIDWK |
| M0RH47 | *Musa acuminata* subsp. malaccensis | Polyketide synthases | | 3.574 | 3 | 347 | 38.4 | | 1 | IPEGVEGAILVK |
| M0RVZ3 | *Musa acuminata* subsp. malaccensis | Polyketide synthases | | 2.303 | 3 | 357 | 39 | | 1 | NVTGTLSPYR |
| M0SZ88 | *Musa acuminata* subsp. malaccensis | Polyketide synthases | | 52.861 | 45 | 345 | 37.8 | | 11 | MLDAVLLNMR |
| M0SLZ5 | *Musa acuminata* subsp. malaccensis | Polyketide synthases | | 45.846 | 41 | 309 | 32.7 | | 9 | NIDFVQAAGLPLAIETANEGLER |
| M0SP93 | *Musa acuminata* subsp. malaccensis | Polyketide synthases | | 7.086 | 8 | 325 | 34.2 | | 2 | VGDEVYGDINEK |
| M0SQC7 | *Musa acuminata* subsp. malaccensis | Polyketide synthases | | 6.822 | 5 | 364 | 39.1 | | 2 | LPSLGPYDVR |
| M0T1R4 | *Musa acuminata* subsp. malaccensis | Polyketide synthases | | 4.982 | 3 | 372 | 39.9 | | 1 | LAETGIFNLR |
| M0TWH2 | *Musa acuminata* subsp. malaccensis | GRAM domain protein | | 7.425 | 6 | 256 | 28 | | 1 | IATVNPVTLGENPSHK |
| Lipid metabolism | | | | | | | | | | |
| M0TUX7 | *Musa acuminata* subsp. malaccensis | Lipase | | 4.636 | 3 | 570 | 64.4 | | 1 | DDWAGLLDPIDPLLR |
| M0RPY9 | *Musa acuminata* subsp. malaccensis | Lipase | | 3.072 | 4 | 244 | 27.5 | | 1 | TNDNTGAYAR |
| M0S704 | *Musa acuminata* subsp. malaccensis | Lipase | | 36.014 | 22 | 324 | 34 | | 1 | VNFPPWGIDFPGR |
| M0T3H2 | *Musa acuminata* subsp. malaccensis | Patatin | | 26.871 | 19 | 413 | 45.5 | | 6 | LITVLSIDGGGVR |
| M0RRG7 | *Musa acuminata* subsp. malaccensis | Aldehyde dehydrogenase | | 6.564 | 5 | 493 | 53.4 | | 2 | SFAPTLVDAMK |
| RNA processing | | | | | | | | | | |
| M0TNP2 | *Musa acuminata* subsp. malaccensis | Prohibitin | | 6.667 | 8 | 292 | 32.3 | | 2 | ARPNLVESTSGSR |
| M0TIQ4 | *Musa acuminata* subsp. malaccensis | Prohibitin | | 3.505 | 3 | 306 | 33.8 | | 1 | DLQMVNLTLR |
| M0U5V0 | *Musa acuminata* subsp. malaccensis | RNA recognition motif (RRM) | | 5.802 | 5 | 278 | 29.5 | | 1 | DDNASSSAGSAVQK |
| M0TY68 | *Musa acuminata* subsp. malaccensis | RNA recognition motif (RRM) | | 4.709 | 7 | 238 | 23.9 | | 1 | VFVGGLSYGTDDQSLR |
| M0SVW9 | *Musa acuminata* subsp. malaccensis | RNA recognition motif (RRM) | | 3.794 | 5 | 264 | 29.1 | | 1 | SVADPNPVIDGR |
| M0SMU9 | *Musa acuminata* subsp. malaccensis | RNA recognition motif (RRM) | | 1.964 | 1 | 743 | 81.4 | | 1 | SVNITPAENYK |
| Pentose phosphate pathways | | | | | | | | | | |
| M0TUH8 | *Musa acuminata* subsp. malaccensis | Glucose-6-phosphate-1-dehydrogenase | | 32.426 | 21 | 520 | 59.4 | | 8 | SAEDLSAQLGELFDEQQLYR |
| M0RHF3 | *Musa acuminata* subsp. malaccensis | Glucose-6-phosphate-1-dehydrogenase | | 8.762 | 4 | 595 | 66.8 | | 1 | SDELDAAWELFTPLLK |
| M0TFQ1 | *Musa acuminata* subsp. malaccensis | Glucose-6-phosphate isomerase | | 22.422 | 14 | 631 | 70.2 | | 6 | NVVPDVWDVLDK |
| M0RL80 | *Musa acuminata* subsp. malaccensis | Glucose-6-phosphate isomerase | | 20.345 | 11 | 580 | 63.9 | | 1 | LQIENTLDAICK |
| M0U0G9 | *Musa acuminata* subsp. malaccensis | Glucose-6-phosphate isomerase | | 16.947 | 17 | 277 | 307 | | 2 | VNQGITVYGNK |
| M0U0G8 | *Musa acuminata* subsp. malaccensis | Glucose-6-phosphate isomerase | | 14.688 | 19 | 234 | 25.2 | | 1 | QGVAITQQNSLLDNAAR |
| Phenylpropanoid pathways | | | | | | | | | | |
| M0RPI3 | *Musa acuminata* subsp. malaccensis | Ligase_CoA protein | | 26.845 | 12 | 608 | 65.9 | | 6 | QGVAITQQNSLLDNAAR |
| Fatty acid metabolism | | | | | | | | | | |
| M0SMH7 | *Musa acuminata* subsp. malaccensis | Biotin carboxylase | | 18.52 | 10 | 531 | 58 | | 5 | LLEEAPSPALSPELR |
| M0SDU5 | *Musa acuminata* subsp. malaccensis | Lipoxygenase | | 14.2 | 5 | 846 | 95 | | 3 | LDPNIYGPPESLITEELIER |
| M0SM56 | *Musa acuminata* subsp. malaccensis | Ceramidase | | 5.799 | 3 | 656 | 72.4 | | 2 | SPSAYLNNPDAER |
| Post-translational modification | | | | | | | | | | |
| M0T3Y0 | *Musa acuminata* subsp. malaccensis | Protein phosphatase (PP) | | 2.838 | 2 | 570 | 61.4 | | 1 | LLVANVGDSR |
| M0SBG7 | *Musa acuminata* subsp. malaccensis | Protein phosphatase (PP) | | 1.856 | 3 | 357 | 39.5 | | 1 | GSADNITCIVVR |
| M0RGP4 | *Musa acuminata* subsp. malaccensis | Protein phosphatase (PP) | | 21.773 | 22 | 283 | 31 | | 5 | VMSNQEAVDFIK |
| M0S1E6 | *Musa acuminata* subsp. malaccensis | Ubiquitin | | 19.311 | 29 | 147 | 16.6 | | 3 | SWTGTIIGPHNTVHEGR |
| M0RFG5 | *Musa acuminata* subsp. malaccensis | Ubiquitin | | 15.665 | 25 | 188 | 22.2 | | 4 | TITLEVESSDTIDNVK |
| M0RUN0 | *Musa acuminata* subsp. malaccensis | Ubiquitin | | 9.413 | 13 | 235 | 25.9 | | 2 | SQPISHGPSSPDSLLQDAAK |
| M0STD8 | *Musa acuminata* subsp. malaccensis | Ubiquitin | | 6.174 | 10 | 183 | 20.9 | | 1 | VELPDAYPYK |
| M0SY50 | *Musa acuminata* subsp. malaccensis | Ubiquitin | | 5.356 | 10 | 183 | 21 | | 1 | VELPDAYPYK |
| M0TY04 | *Musa acuminata* subsp. malaccensis | Ubiquitin | | 4.469 | 6 | 173 | 19.5 | | 1 | TNEAEAVETAK |
| M0TBZ7 | *Musa acuminata* subsp. malaccensis | Ubiquitin | | 4.023 | 5 | 240 | 26.6 | | 1 | EQWSPALTLSK |
| M0TL36 | *Musa acuminata* subsp. malaccensis | Ubiquitin | | 4.017 | 14 | 94 | 10.9 | | 1 | LQALIDLPSNNQR |
| M0TLI8 | *Musa acuminata* subsp. malaccensis | Ubiquitin | | 3.768 | 9 | 108 | 12.1 | | 1 | GQDGNEVFFR |
| M0SZS8 | *Musa acuminata* subsp. malaccensis | Ubiquitin | | 3.535 | 1 | 1028 | 107.9 | | 1 | VASATGVPVELQR |
| Transcription factors | | | | | | | | | | |
| M0RIL2 | *Musa acuminata* subsp. malaccensis | BZIP domain protein | | 12.753 | 9 | 336 | 36.7 | | 2 | DTTGLTTENR |
| M0SZD3 | *Musa acuminata* subsp. malaccensis | NAC-A/B | | 77.403 | 48 | 239 | 26.8 | | 7 | SPTSDTYVIFGEAK |
| M0RVE0 | *Musa acuminata* subsp. malaccensis | AP2/ERF domain | | 4.998 | 4 | 562 | 61.8 | | 2 | VLQDGGVWEK |
| Nucleotide metabolism | | | | | | | | | | |
| M0RV37 | *Musa acuminata* subsp. malaccensis | Histone H4 protein | | 27 | 4 | 150 | 16.4 | | 4 | ISGLIYEETR |
| M0TCC5 | *Musa acuminata* subsp. malaccensis | Histone H2B protein | | 22.338 | 23 | 207 | 23.3 | | 4 | QVHPDIGISSK |
| Transport | | | | | | | | | | |
| M0T8M2 | *Musa acuminata* subsp. malaccensis | Acyl carrier protein | | 16.674 | 20 | 139 | 14.8 | | 2 | QLALADDVSITGDSK |
| M0U500 | *Musa acuminata* subsp. malaccensis | Acyl carrier protein | | 13.671 | 11 | 141 | 14.8 | | 2 | QLALPENATVAGHSK |
| M0T0S8 | *Musa acuminata* subsp. malaccensis | Acyl carrier protein | | 6.965 | 4 | 456 | 48.4 | | 1 | ALESAGLGVGSQTLNK |
| M0TVW6 | *Musa acuminata* subsp. malaccensis | Acyl carrier protein | | 17.982 | 13 | 140 | 14.8 | | 1 | IITVQDAADLIQELVEAK |
| M0T0A6 | *Musa acuminata* subsp. malaccensis | Clathrin light chain | | 6.528 | 9 | 319 | 34.9 | | 3 | EKETLYLANQEK |
| M0U2X9 | *Musa acuminata* subsp. malaccensis | Clathrin light chain | | 20.413 | 17 | 325 | 34.3 | | 1 | VDISVTEGQTVK |
| M0SEJ5 | *Musa acuminata* subsp. malaccensis | Clathrin light chain | | 8.939 | 8 | 286 | 31.5 | | 1 | NQILAEAEEYK |
| M0RP97 | *Musa acuminata* subsp. malaccensis | Clathrin light chain | | 21.826 | 22 | 321 | 35.1 | | 5 | QNEIIAEAEEFK |
| M0S8I6 | *Musa acuminata* subsp. malaccensis | ATPase_AAA | | 17.911 | 9 | 475 | 51.7 | | 2 | VPIIVTGNDFSTLYAPLIR |
| M0TIX4 | *Musa acuminata* subsp. malaccensis | Cytosol_adaptor protein | | 79.323 | 45 | 496 | 51.9 | | 16 | MPLEESYWESMK |
| M0SZD3 | *Musa acuminata* subsp. malaccensis | NAC-A/B | | 77.403 | 48 | 239 | 26.8 | | 7 | SPTSDTYVIFGEAK |
| M0S8L2 | *Musa acuminata* subsp. malaccensis | vacuolar proton pump protein | | 52.627 | 32 | 488 | 54.4 | | 12 | VTLFLNLANDPTIER |
| M0SHD1 | *Musa acuminata* subsp. malaccensis | Importin | | 43.178 | 22 | 530 | 58.4 | | 1 | IVTVCLEGLENILK |
| M0S3R4 | *Musa acuminata* subsp. malaccensis | Importin | | 6.249 | 3 | 840 | 92.9 | | 2 | TAAYETLNEVVR |
| M0RGY4 | *Musa acuminata* subsp. malaccensis | Flavodoxin | | 33.516 | 51 | 203 | 21.7 | | 5 | SDAPIITPNDLAEADGILFGFPTR |
| M0T1W9 | *Musa acuminata* subsp. malaccensis | Flavodoxin | | 19.191 | 25 | 203 | 21.7 | | 2 | LWQVPETLPEEVLGK |
| M0TML4 | *Musa acuminata* subsp. malaccensis | Flavodoxin | | 4.245 | 6 | 256 | 27.2 | | 1 | GGSPYGAGVFAGDGTR |
