# Supplementary material
Source: Research Square preprint supplement (doi:10.21203/rs.3.rs-9184162/v1)
Supplement: Supplementary file 3 [file a11bbd5948fcff82c5b908cb.docx]

| Suppl. Table 3- Protein identified using orbitrap fusion mass spectrometry in banana fruit (peel) tissues at 12-DAR (days after ripening). | | | | | | | | | | |
| --- | --- | --- | --- | --- | --- | --- | --- | --- | --- | --- |
| Accession No./Protein ID | **Origin/Taxonomy** | **Protein description** | **Sum peptide score** | | **Coverage peptide** | **A.A** | **Protein molecular weight (KDa)** | **Unique Peptides** | | **Protein sequence** |
| Amino acid metabolism | | | | | | | | | | |
| M0U3I3 | *Musa acuminata* subsp. malaccensis | Cysteine synthase | | 34.327 | 35 | 324 | 33.9 | 6 | | LYGVEPVESAVLSGGKPGPHK |
| M0SZX7 | *Musa acuminata* subsp. malaccensis | Cysteine synthase | | 32.24 | 22 | 359 | 38.8 | 7 | | VTEGCHAQIAAK |
| M0SQU8 | *Musa acuminata* subsp. malaccensis | Cysteine synthase | | 10.478 | 13 | 325 | 34.3 | 1 | | VDALVSGIGTGGTITGTGK |
| M0TWV0 | *Musa acuminata* subsp. malaccensis | Cysteine synthase | | 39.13 | 31 | 380 | 40.5 | 8 | | NLDLEVVDEIIEISSDEAVEIAK |
| M0T8H5 | *Musa acuminata* subsp. malaccensis | Aminomethyltransferase | | 47.426 | 26 | 413 | 44.8 | 4 | | TGYTGEDGFEISVPSEHAVDLAK |
| M0SUJ7 | *Musa acuminata* subsp. malaccensis | Aminomethyltransferase | | 32.188 | 18 | 413 | 44.6 | 2 | | TLDINGAHCFLTR |
| M0RXI9 | *Musa acuminata* subsp. malaccensis | Glycine cleavage system H | | 43.875 | 27 | 164 | 17.4 | 3 | | LTETPGLINTSPYEDGWMIK |
| M0RS74 | *Musa acuminata* subsp. malaccensis | Glycine cleavage system H | | 10.025 | 12 | 155 | 16.8 | 1 | | FCEEEDAKH |
| M0U9P1 | *Musa acuminata* subsp. malaccensis | Glycine cleavage system H | | 4.575 | 18 | 164 | 17.5 | 2 | | LTETPGLINSSPYEDGWMIK |
| M0SH72 | *Musa acuminata* subsp. malaccensis | Glycine cleavage system H | | 9.68 | 12 | 155 | 16.8 | 1 | | YADTHEWVK |
| M0SB79 | *Musa acuminata* subsp. malaccensis | Aspartate aminotransferase | | 2.987 | 6 | 196 | 20.9 | 1 | | ALLEQLKPGGR |
| M0SM56 | *Musa acuminata* subsp. malaccensis | Amidase | | 1.026 | 1 | 656 | 72.4 | 1 | | AVELFDK |
| M0RN83 | *Musa acuminata* subsp. malaccensis | Chorismate synthase | | 1.178 | 2 | 449 | 48.5 | 1 | | AMLSLPATK |
| M0TEW6 | *Musa acuminata* subsp. malaccensis | Chorismate synthase | | 12.023 | 12 | 259 | 29.4 | 3 | | LLTFEAVEEMVK |
| Cell wall metabolism | | | | | | | | | | |
| M0TGN6 | *Musa acuminata* subsp. malaccensis | Pectinesterase | | 8.193 | 4 | 507 | 54.4 | | 2 | DDPNEPTGIVIHR |
| M0SC42 | *Musa acuminata* subsp. malaccensis | Pectinesterase | | 21.624 | 14 | 401 | 42.8 | | 5 | LPSPGQINTITAQGR |
| M0RPM3 | *Musa acuminata* subsp. malaccensis | Pectinesterase | | 8.182 | 4 | 566 | 62.1 | | 2 | AGAYLENVEVGK |
| M0T2F6 | *Musa acuminata* subsp. malaccensis | Beta-hexosaminidase | | 8.503 | 4 | 550 | 62.1 | | 2 | YTVEDAYEVVDFAK |
| M0RQ03 | *Musa acuminata* subsp. malaccensis | Beta-hexosaminidase | | 8.526 | 3 | 537 | 60.6 | | 1 | TFDQSTGDVAADQYHK |
| M0S3Q7 | *Musa acuminata* subsp. malaccensis | Beta-hexosaminidase | | 8.544 | 16 | 115 | 13.2 | | 1 | SNQYENTSLVQIEGVNTK |
| M0TTV0 | *Musa acuminata* subsp. malaccensis | Xyloglucan endotransglucosylase/hydrolase | | 11.621 | 14 | 286 | 32.6 | | 3 | SGQPYTVQTNVYAHGK |
| M0RMW1 | *Musa acuminata* subsp. malaccensis | Xyloglucan endotransglucosylase/hydrolase | | 11.614 | 10 | 326 | 34.6 | | 3 | LDPSSGCGFASNK |
| M0TQQ9 | *Musa acuminata* subsp. malaccensis | Xyloglucan endotransglucosylase/hydrolase | | 11.586 | 11 | 223 | 24.9 | | 2 | SGQPYTVQTNVYAHGK |
| M0TGI2 | *Musa acuminata* subsp. malaccensis | Xyloglucan endotransglucosylase/hydrolase | | 3.537 | 4 | 278 | 31.1 | | 1 | NYESLGIPYPSK |
| M0TLF4 | *Musa acuminata* subsp. malaccensis | Alpha-mannosidase | | 32.441 | 5 | 1077 | 120.9 | | 5 | INITEMNLSANQER |
| M0TWG0 | *Musa acuminata* subsp. malaccensis | Alpha-mannosidase | | 6.399 | 2 | 1108 | 124.7 | | 2 | LAHLYEVGEHK |
| M0U935 | *Musa acuminata* subsp. malaccensis | Alpha-mannosidase | | 6.359 | 5 | 281 | 29.9 | | 1 | IDPLGEGSR |
| M0T6Z4 | *Musa acuminata* subsp. malaccensis | Alpha-mannosidase | | 5.388 | 3 | 731 | 82.3 | | 2 | QDLAEANANVR |
| M0SQP6 | *Musa acuminata* subsp. malaccensis | Beta-galactosidase | | 5.45 | 2 | 87 | 95.4 | | 1 | GYFDAPEGNDPVAIDFTGMGK |
| M0RIL4 | *Musa acuminata* subsp. malaccensis | Peroxidase | | 13.445 | 15 | 287 | 31 | | 4 | MGQLSVLTGNK |
| M0T710 | *Musa acuminata* subsp. malaccensis | Peroxidase | | 2.898 | 3 | 264 | 28.2 | | 1 | GYEIIDAIK |
| M0RUU7 | *Musa acuminata* subsp. malaccensis | Peroxidase | | 29.79 | 19 | 296 | 31.4 | | 4 | DMVALSGSHTIGLAR |
| M0RVD5 | *Musa acuminata* subsp. malaccensis | Peroxidase | | 18.475 | 13 | 361 | 39 | | 3 | DAGPNLSLAGFDVIEEVK |
| M0TBJ2 | *Musa acuminata* subsp. malaccensis | Peroxidase | | 28.799 | 24 | 366 | 40 | | 7 | DAVVLSGGPEWDVR |
| M0RRP1 | *Musa acuminata* subsp. malaccensis | Peroxidase | | 11.847 | 9 | 439 | 48.5 | | 1 | MGLDDKEIVALSGAHTLGR |
| M0TG28 | *Musa acuminata* subsp. malaccensis | Peroxidase | | 10.896 | 9 | 423 | 46.6 | | 4 | VLEQLSGQTPVFSK |
| M0TFG7 | *Musa acuminata* subsp. malaccensis | Peroxidase | | 9.987 | 8 | 351 | 38.2 | | 4 | DAEAPDPEGR |
| M0T5C0 | *Musa acuminata* subsp. malaccensis | Peroxidase | | 8.871 | 12 | 265 | 28.1 | | 2 | QDMVALAGAHTIGQAR |
| M0TGM1 | *Musa acuminata* subsp. malaccensis | Peroxidase | | 7.685 | 6 | 333 | 35.7 | | 1 | NVVQQAQSSDVR |
| M0TJQ7 | *Musa acuminata* subsp. malaccensis | Peroxidase | | 5.189 | 10 | 265 | 28 | | 1 | TANPNQNSVR |
| M0RLG2 | *Musa acuminata* subsp. malaccensis | Peroxidase | | 3.473 | 5 | 345 | 37.4 | | 2 | GFDVVDNIK |
| M0TCA6 | *Musa acuminata* subsp. malaccensis | Peroxidase | | 99.018 | 61 | 249 | 27.3 | | 6 | SGFEGAWTSNPLIFDNSYFK |
| M0SWF7 | *Musa acuminata* subsp. malaccensis | Peroxidase | | 96.294 | 40 | 493 | 53.5 | | 14 | EDKPEPPVEGR |
| M0RIM9 | *Musa acuminata* subsp. malaccensis | Peroxidase | | 48.499 | 37 | 373 | 40.6 | | 6 | QGKDEDLLILPTDAVLFEDSHFK |
| M0U4L1 | *Musa acuminata* subsp. malaccensis | Peroxidase | | 41.079 | 20 | 327 | 35.6 | | 6 | RDSVTFAPAADTIASIPSPR |
| M0TPT9 | *Musa acuminata* subsp. malaccensis | Peroxidase | | 39.939 | 30 | 316 | 34.4 | | 7 | MGEIGILTGSEGEVR |
| M0T062 | *Musa acuminata* subsp. malaccensis | Peroxidase | | 31.246 | 30 | 261 | 27.9 | | 5 | DSVAHYGGIFYQVPAGR |
| M0T4F6 | *Musa acuminata* subsp. malaccensis | Peroxidase | | 25.188 | 31 | 241 | 25.1 | | 4 | MGNISPLTGTDGEIR |
| M0U174 | *Musa acuminata* subsp. malaccensis | Xylose isomerase | | 16.132 | 7 | 544 | 60.9 | | 3 | TLAETNANLDEVVALAK |
| M0TX33 | *Musa acuminata* subsp. malaccensis | t-SNARE protein | | 13.513 | 6 | 488 | 54 | | 2 | LIDDLDEHVDVTDSR |
| M0S500 | *Musa acuminata* subsp. malaccensis | t-SNARE protein | | 2.997 | 11 | 122 | 14 | | 1 | AALFDGIEEGGIR |
| M0TCL9 | *Musa acuminata* subsp. malaccensis | t-SNARE protein | | 6.852 | 6 | 233 | 26.2 | | 1 | TAGLDNQGIVGLQR |
| M0T9A4 | *Musa acuminata* subsp. malaccensis | t-SNARE protein | | 0.727 | 3 | 267 | 30.2 | | 2 | LLEEVPK |
| M0RU20 | *Musa acuminata* subsp. malaccensis | t-SNARE protein | | 7.48 | 13 | 266 | 30.1 | | 4 | QMDETDQAIER |
| M0S8T2 | *Musa acuminata* subsp. malaccensis | t-SNARE protein | | 6.692 | 7 | 295 | 33.8 | | 2 | LIETGNSEQIFQK |
| M0TBQ9 | *Musa acuminata* subsp. malaccensis | t-SNARE protein | | 5.312 | 7 | 274 | 30.6 | | 2 | HGTDNLTTAR |
| M0TM54 | *Musa acuminata* subsp. malaccensis | t-SNARE protein | | 1.587 | 3 | 311 | 34.3 | | 1 | TSVVAGLR |
| Carbon metabolism | | | | | | | | | | |
| M0SR05 | *Musa acuminata* subsp. malaccensis | Malate dehydrogenase | | 27.102 | 14 | 348 | 36.3 | | 1 | NVIIWGNHSSTQYPDVSHATVK |
| M0U880 | *Musa acuminata* subsp. malaccensis | Malate dehydrogenase | | 81.73 | 38 | 332 | 35.5 | | 13 | RTQDGGTEVVEAK |
| Fatty acid metabolism | | | | | | | | | | |
| M0SMH7 | *Musa acuminata* subsp. malaccensis | Biotin carboxylase | | 9.192 | 5 | 531 | 58 | | 2 | LLEEAPSPALSPELR |
| M0SM56 | *Musa acuminata* subsp. malaccensis | Neutral ceramidase | | 1.026 | 1 | 656 | 72.4 | | 1 | AVELFDK |
| TCA cycle | | | | | | | | | |  |
| M0S7D7 | *Musa acuminata* subsp. malaccensis | Succinate-CoA ligase | | 9.612 | 8 | 341 | 35.5 | | 1 | KGGTEHLGLPVFNTVAEAK |
| M0TRQ8 | *Musa acuminata* subsp. malaccensis | Succinate-CoA ligase | | 38.112 | 25 | 421 | 45 | | 10 | ESGMTLITAEDLDDAAEK |
| M0TQN5 | *Musa acuminata* subsp. malaccensis | Succinate-CoA ligase | | 3.916 | 6 | 364 | 38.2 | | 1 | EAGVTVVESPAK |
| M0TDM1 | *Musa acuminata* subsp. malaccensis | Succinate dehydrogenase | | 1.991 | 2 | 599 | 65.8 | | 1 | AFGGQSLDFGK |
| M0U9H9 | *Musa acuminata* subsp. malaccensis | Dihydrolipoamide acetyltransferase | | 14.712 | 11 | 495 | 53.3 | | 4 | DVLVGQPIAITVENPDDVK |
| Signal transduction | | | | | | | | | | |
| M0SZK9 | *Musa acuminata* subsp. malaccensis | Nucleoside diphosphate kinase | | 41.303 | 43 | 148 | 16.3 | | 5 | KIIGATNPADSAPGTIR |
| M0SK27 | *Musa acuminata* subsp. malaccensis | Nucleoside diphosphate kinase | | 7.199 | 9 | 238 | 26.4 | | 2 | TFIAIKPDGVQR |
| M0U940 | *Musa acuminata* subsp. malaccensis | Nucleoside diphosphate kinase | | 11.644 | 18 | 234 | 25.7 | | 3 | LIGATNPLQAEPGTIR |
| M0SS87 | *Musa acuminata* subsp. malaccensis | Tubulin | | 26.847 | 17 | 446 | 50.2 | | 1 | AVLMDLEPGTMDALR |
| M0S1G7 | *Musa acuminata* subsp. malaccensis | Tubulin | | 6.313 | 24 | 112 | 12.6 | | 3 | QQENVLAESR |
| M0S7D0 | *Musa acuminata* subsp. malaccensis | Tubulin | | 2.265 | 2 | 450 | 49.6 | | 1 | EDAANNFAR |
| Stress, defense response/redox mechanism | | | | | | | | | | |
| M0S4H9 | *Musa acuminata* subsp. malaccensis | Superoxide dismutase | | 59.186 | 57 | 152 | 15.2 | | 7 | AVVVHADPDDLGKGGHELSK |
| M0SFL6 | *Musa acuminata* subsp. malaccensis | Superoxide dismutase | | 12.489 | 21 | 243 | 26.6 | | 3 | LLVEATANQDPLVTK |
| M0RG01 | *Musa acuminata* subsp. malaccensis | Superoxide dismutase | | 27.775 | 24 | 216 | 22 | | 3 | AFVVHELEDDLGK |
| M0U200 | *Musa acuminata* subsp. malaccensis | Superoxide dismutase | | 18.663 | 17 | 229 | 23.5 | | 2 | GGHELSLTTGNAGGR |
| M0SLQ2 | *Musa acuminata* subsp. malaccensis | Superoxide dismutase | | 5.025 | 8 | 160 | 16.4 | | 1 | AVVVHADPDDLGR |
| M0RP81 | *Musa acuminata* subsp. malaccensis | Glutathione peroxidase | | 15.819 | 25 | 168 | 18.5 | | 3 | SAASIHDFTVK |
| M0SS86 | *Musa acuminata* subsp. malaccensis | Glutathione peroxidase | | 3.435 | 12 | 168 | 18.7 | | 1 | FKAEYPIFDK |
| M0SWM2 | *Musa acuminata* subsp. malaccensis | Glutathione peroxidase | | 4.284 | 6 | 170 | 19.2 | | 1 | SPSSIEQDIQK |
| M0UBI2 | *Musa acuminata* subsp. malaccensis | Tyrosinase | | 48.096 | 28 | 588 | 66.8 | | 5 | VNEFGTTAQALDASNPLR |
| M0UBI1 | *Musa acuminata* subsp. malaccensis | Tyrosinase | | 25.812 | 18 | 452 | 52.1 | | 1 | VEFEDNDWLDSTFLFHDENEQLVK |
| M0SAT8 | *Musa acuminata* subsp. malaccensis | Formate dehydrogenase | | 89.346 | 44 | 383 | 42.1 | | 12 | NLQLLLTAGIGSDHIDLK |
| M0TFM8 | *Musa acuminata* subsp. malaccensis | Formate dehydrogenase | | 2.726 | 3 | 367 | 40.3 | | 1 | AIALTVDTPR |
| M0U4X1 | *Musa acuminata* subsp. malaccensis | Germin-like proteins | | 19.644 | 16 | 234 | 25.1 | | 3 | IDYAPFGLNPPHSHPR |
| M0S2X3 | *Musa acuminata* subsp. malaccensis | Germin-like proteins | | 23.472 | 23 | 219 | 22.9 | | 2 | IDYAPGGLNPPHTHPR |
| M0SZM3 | *Musa acuminata* subsp. malaccensis | Germin-like proteins | | 15.959 | 23 | 219 | 23 | | 2 | IPGLNTLGVSMSR |
| M0U0R8 | *Musa acuminata* subsp. malaccensis | Germin-like proteins | | 3.564 | 4 | 256 | 27.1 | | 1 | VTFLDDAQVK |
| M0UCZ2 | *Musa acuminata* subsp. malaccensis | Germin-like proteins | | 3.609 | 12 | 145 | 15.6 | | 1 | DPTNVTPDDFYISGLDK |
| M0T386 | *Musa acuminata* subsp. malaccensis | Barwin domain protein | | 41.957 | 72 | 145 | 15.6 | | 6 | YGWTAFCGPVGPTGR |
| M0RX69 | *Musa acuminata* subsp. malaccensis | Isocitrate dehydrogenase | | 3.72 | 4 | 410 | 45.8 | | 1 | VANPVVEMDGDEMTR |
| M0RGW5 | *Musa acuminata* subsp. malaccensis | Isocitrate dehydrogenase | | 4.691 | 4 | 367 | 40 | | 1 | ENTEGEYSGLEHQVVR |
| M0TQW7 | *Musa acuminata* subsp. malaccensis | Thioredoxin | | 35.212 | 27 | 269 | 29.3 | | 2 | SGGLGDLNYPLISDVTK |
| M0T818 | *Musa acuminata* subsp. malaccensis | Thioredoxin | | 38.044 | 34 | 267 | 29.3 | | 4 | SGGLGDLNYPLISDITK |
| M0SR53 | *Musa acuminata* subsp. malaccensis | Thioredoxin | | 12.619 | 28 | 114 | 12.8 | | 3 | IVGAHKDELPR |
| M0UCA4 | *Musa acuminata* subsp. malaccensis | Thioredoxin | | 8.18 | 17 | 213 | 23.5 | | 3 | LPFTLLSDEGNK |
| M0U289 | *Musa acuminata* subsp. malaccensis | Thioredoxin | | 4.687 | 8 | 211 | 24.1 | | 1 | SQVILFDGEASSNPVK |
| M0RU09 | *Musa acuminata* subsp. malaccensis | Thioredoxin | | 1.157 | 1 | 1065 | 117 | | 1 | LSADTEIIK |
| M0TQ20 | *Musa acuminata* subsp. malaccensis | Thioredoxin | | 10.463 | 8 | 308 | 33.8 | | 2 | DMDVVEVPTFLFIK |
| M0S825 | *Musa acuminata* subsp. malaccensis | Thioredoxin | | 6.929 | 13 | 209 | 23.7 | | 2 | EITEGEFLGEVTGSER |
| M0SEK3 | *Musa acuminata* subsp. malaccensis | Catalase | | 38.15 | 18 | 492 | 57.1 | | 4 | NHSHATQDLYDSIAAGNYPEWK |
| M0SYW1 | *Musa acuminata* subsp. malaccensis | Catalase | | 19.487 | 8 | 462 | 53.7 | | 1 | DEEVDYFPSR |
| M0S0R3 | *Musa acuminata* subsp. malaccensis | Catalase | | 8.046 | 30 | 112 | 13.4 | | 3 | WAEQLAHPK |
| M0S7E5 | *Musa acuminata* subsp. malaccensis | Small heat shock proteins | | 7.466 | 10 | 235 | 25.9 | | 2 | VSVEDDVLVIK |
| M0RH79 | *Musa acuminata* subsp. malaccensis | Small heat shock proteins | | 5.708 | 20 | 191 | 21.5 | | 3 | KGEEEEVEGEKWHR |
| M0THM8 | *Musa acuminata* subsp. malaccensis | Small heat shock proteins | | 2.701 | 10 | 168 | 18.6 | | 1 | ETPEAHVFK |
| M0S1S3 | *Musa acuminata* subsp. malaccensis | Small heat shock proteins | | 1.453 | 10 | 162 | 18.3 | | 1 | FRLPEDAK |
| M0S1S4 | *Musa acuminata* subsp. malaccensis | Small heat shock proteins | | 44.189 | 44 | 156 | 17.8 | | 4 | SLSETRPGFASETSAFANTR |
| M0RK37 | *Musa acuminata* subsp. malaccensis | Small heat shock proteins | | 40.619 | 34 | 161 | 17.6 | | 6 | RGPDGEDGKDGGVK |
| M0TUL3 | *Musa acuminata* subsp. malaccensis | Small heat shock proteins | | 33.103 | 39 | 206 | 22.5 | | 5 | ILEHIPFGLDRDDMAVVTHAR |
| M0RMR1 | *Musa acuminata* subsp. malaccensis | Small heat shock proteins | | 24.102 | 36 | 216 | 24 | | 8 | DYDDDNRDVDLER |
| M0S0L4 | *Musa acuminata* subsp. malaccensis | Small heat shock proteins | | 21.494 | 27 | 219 | 24.6 | | 5 | DGVLYITIPK |
| M0TWA8 | *Musa acuminata* subsp. malaccensis | Small heat shock proteins | | 20.402 | 39 | 157 | 18 | | 2 | SLSETRPSFVSDASAFANTR |
| M0RIT9 | *Musa acuminata* subsp. malaccensis | Small heat shock proteins | | 17.822 | 35 | 194 | 21.9 | | 7 | RGVAPSAPLGLWDR |
| M0TCH9 | *Musa acuminata* subsp. malaccensis | Small heat shock proteins | | 12.454 | 35 | 165 | 18.7 | | 3 | AAMENGVLTVTVPK |
| M0S2B1 | *Musa acuminata* subsp. malaccensis | Eukaryotic translation initiation factor (eIF) | | 16.922 | 22 | 23 | 26 | | 4 | SENDFLEYAELLSHK |
| M0S626 | *Musa acuminata* subsp. malaccensis | Eukaryotic translation initiation factor (eIF) | | 11.075 | 13 | 230 | 25.9 | | 2 | TSEIASEVLADPLAEK |
| M0RJA0 | *Musa acuminata* subsp. malaccensis | Eukaryotic translation initiation factor (eIF) | | 55.653 | 43 | 159 | 17.3 | | 2 | DLVVTVMSAMGEEQICALK |
| M0S5Z8 | *Musa acuminata* subsp. malaccensis | Eukaryotic translation initiation factor (eIF) | | 40.01 | 33 | 321 | 35,4 | | 10 | SADGSHFLTGSLDK |
| M0RQT6 | *Musa acuminata* subsp. malaccensis | Eukaryotic translation initiation factor (eIF) | | 8.418 | 10 | 235 | 25.4 | | 2 | NSLPDQVVVQR |
| M0RQT5 | *Musa acuminata* subsp. malaccensis | Eukaryotic translation initiation factor (eIF) | | 58.419 | 43 | 377 | 41.6 | | 1 | LPTDETLLAQIK |
| M0T7M2 | *Musa acuminata* subsp. malaccensis | Eukaryotic translation initiation factor (eIF) | | 60.919 | 43 | 159 | 17.4 | | 1 | DLVVTVMSAMGEEQICALK |
| M0RHD8 | *Musa acuminata* subsp. malaccensis | Eukaryotic translation initiation factor (eIF) | | 49.789 | 4 | 1706 | 189 | | 1 | LPTDETLLAQIK |
| M0SFU5 | *Musa acuminata* subsp. malaccensis | Eukaryotic translation initiation factor (eIF) | | 40.349 | 11 | 527 | 59.5 | | 3 | LPTDESLLAPIKDGFAEGK |
| M0TXJ4 | *Musa acuminata* subsp. malaccensis | Eukaryotic translation initiation factor (eIF) | | 12.239 | 17 | 270 | 30.3 | | 4 | TENLTVADSGEPSFAGMK |
| M0RKE2 | *Musa acuminata* subsp. malaccensis | Peroxiredoxin | | 20.375 | 41 | 121 | 13.3 | | 3 | VANIEEGGAFTISGAEEILK |
| M0TP05 | *Musa acuminata* subsp. malaccensis | Peroxiredoxin | | 26.377 | 27 | 197 | 21.3 | | 5 | VSGGEVILGQI |
| M0RH93 | *Musa acuminata* subsp. malaccensis | Peroxiredoxin | | 27.765 | 30 | 230 | 24.2 | | 4 | LPDATLSYFGADGELK |
| M0SYX0 | *Musa acuminata* subsp. malaccensis | Peroxiredoxin | | 13.609 | 15 | 240 | 25.6 | | 2 | YAMLVEDGVVK |
| M0RNM6 | *Musa acuminata* subsp. malaccensis | Lactoylglutathione lyase | | 16.883 | 21 | 233 | 26.2 | | 4 | EAPSNNPGLHTQLDDATK |
| M0U4F0 | *Musa acuminata* subsp. malaccensis | Lactoylglutathione lyase | | 18.856 | 15 | 383 | 42.7 | | 1 | ITACLDPDGWK |
| M0S2Q5 | *Musa acuminata* subsp. malaccensis | Glutaredoxin | | 2.534 | 9 | 106 | 11.3 | | 1 | TVPNVFIGGK |
| M0SYF0 | *Musa acuminata* subsp. malaccensis | Glutaredoxin | | 10.701 | 11 | 325 | 35.2 | | 3 | NVQLTVPLEQLIDR |
| Hormonal regulation | | | | | | | | | | |
| M0T8H5 | *Musa acuminata* subsp. malaccensis | Aminomethyl transferase | | 47.426 | 26 | 413 | 44.8 | | 4 | TGYTGEDGFEISVPSEHAVDLAK |
| M0SUJ7 | *Musa acuminata* subsp. malaccensis | Aminomethyl transferase | | 32.188 | 18 | 413 | 44.6 | | 2 | TLDINGAHCFLTR |
| Carbohydrate and Sugar metabolism | | | | | | | | | | |
| M0U300 | *Musa acuminata* subsp. malaccensis | UTP-glucose-1-phosphate uridylyltransferase | | 32.688 | 22 | 467 | 51.3 | | 9 | LVMEDFQPLPSK |
| M0SSK3 | *Musa acuminata* subsp. malaccensis | Phosphoribulokinase | | 49.786 | 35 | 405 | 44.9 | | 6 | RLTSVFGGAAEPPK |
| M0SVE5 | *Musa acuminata* subsp. malaccensis | Phosphoribulokinase | | 46,879 | 24 | 442 | 49.6 | | 3 | EGVAVDKPIYNHVTGLLDPPELINPPK |
| Protein folding | | | | | | | | | | |
| M0TQA1 | *Musa acuminata* subsp. malaccensis | Proteasome subunit alpha | | 6.013 | 9 | 235 | 25.6 | | 2 | NIEIGIVGADR |
| M0TEG6 | *Musa acuminata* subsp. malaccensis | Proteasome subunit alpha | | 3.067 | 6 | 274 | 29.5 | | 2 | GQTEYLR |
| M0SJU7 | *Musa acuminata* subsp. malaccensis | Proteasome subunit alpha | | 1.739 | 3 | 267 | 29.6 | | 1 | EEAVQLALK |
| M0RJE7 | *Musa acuminata* subsp. malaccensis | Proteasome subunit alpha | | 45.972 | 46 | 237 | 26 | | 11 | VAPTYHLYTPSEVEAVIAR |
| M0TYE4 | *Musa acuminata* subsp. malaccensis | Proteasome subunit alpha | | 37.159 | 36 | 273 | 29.2 | | 8 | DGASGGVASVYHVGPDGWK |
| M0RJ25 | *Musa acuminata* subsp. malaccensis | Proteasome subunit alpha | | 30.254 | 39 | 246 | 27.3 | | 9 | VLSTEEIDEHLTAISERD |
| M0S4T8 | *Musa acuminata* subsp. malaccensis | Proteasome subunit alpha | | 20.208 | 22 | 249 | 27.1 | | 3 | QLEEAEIDAIVAEIEAEK |
| M0T186 | *Musa acuminata* subsp. malaccensis | Proteasome subunit alpha | | 20.135 | 24 | 233 | 25 | | 5 | ITQLTDNVYICR |
| M0RJY3 | *Musa acuminata* subsp. malaccensis | Proteasome subunit alpha | | 16.158 | 14 | 265 | 29.3 | | 3 | NQYDTDVTTWSPAGR |
| M0RQ47 | *Musa acuminata* subsp. malaccensis | Proteasome subunit alpha | | 12.985 | 17 | 249 | 27.1 | | 2 | QLDEAEIDAIVAEIEAEK |
| M0RST6 | *Musa acuminata* subsp. malaccensis | Proteasome subunit alpha | | 10.697 | 16 | 221 | 24.3 | | 3 | DAVTPLLESEAVDLVK |
| M0S0K5 | *Musa acuminata* subsp. malaccensis | Protein disulphide isomerase | | 128.888 | 43 | 507 | 56.3 | | 23 | IVVADTLQEVVFGSGK |
| M0T2R2 | *Musa acuminata* subsp. malaccensis | Carboxypeptidase | | 26.563 | 16 | 453 | 50.2 | | 7 | NKDVTEAIQK |
| M0RRJ2 | *Musa acuminata* subsp. malaccensis | Carboxypeptidase | | 16.54 | 22 | 156 | 17.5 | | 3 | SPPVLQEVGYTDDDVFIK |
| M0T7X2 | *Musa acuminata* subsp. Malaccensis | Carboxypeptidase | | 12.257 | 7 | 452 | 48.6 | | 2 | TPLIEEFDDSALPVCWK |
| M0SBM0 | *Musa acuminata* subsp. malaccensis | Carboxypeptidase | | 9.16 | 6 | 396 | 42.8 | | 2 | SYMSQYPAAPPTR |
| M0SD18 | *Musa acuminata* subsp. malaccensis | Carboxypeptidase | | 7.332 | 6 | 492 | 54 | | 2 | GIAIGNAVINDETDSR |
| M0RG03 | *Musa acuminata* subsp. malaccensis | Carboxypeptidase | | 6.8 | 5 | 466 | 51.4 | | 2 | TDWEAATDLTTLLK |
| M0TYA4 | *Musa acuminata* subsp. malaccensis | Carboxypeptidase | | 6.248 | 4 | 496 | 55.4 | | 2 | TASDSHTFLLK |
| M0SBM2 | *Musa acuminata* subsp. malaccensis | Carboxypeptidase | | 5.413 | 4 | 375 | 40.9 | | 1 | LGEPSDASNTVYTR |
| M0RZQ7 | *Musa acuminata* subsp. malaccensis | Cyclophilin | | 80.357 | 49 | 391 | 42.9 | | 14 | IVLDGYNAPVTAGNFLDLVER |
| M0S116 | *Musa acuminata* subsp. malaccensis | Cyclophilin | | 29.692 | 37 | 129 | 13.5 | | 3 | HTGPGVLSMANAGK |
| M0U361 | *Musa acuminata* subsp. malaccensis | Cyclophilin | | 6.618 | 6 | 385 | 42.3 | | 2 | AIQDSLEDISYLLR |
| M0RH95 | *Musa acuminata* subsp. malaccensis | Peptidyl prolyl cis-trans isomerase | | 4.604 | 5 | 234 | 26 | | 1 | SPVGIVDIALK |
| M0TN92 | *Musa acuminata* subsp. malaccensis | Peptidyl prolyl cis-trans isomerase | | 6.803 | 10 | 224 | 23.3 | | 2 | VVGSGPEATQGQLIK |
| M0SVY4 | *Musa acuminata* subsp. malaccensis | Peptidyl prolyl cis-trans isomerase | | 9.179 | 28 | 121 | 13.2 | | 3 | GWDEGVMDMQVGEVAR |
| M0T9M7 | *Musa acuminata* subsp. malaccensis | Peptidyl prolyl cis-trans isomerase | | 2.293 | 3 | 266 | 29.1 | | 1 | ALDFVLR |
| M0TIB9 | *Musa acuminata* subsp. malaccensis | Peptidyl prolyl cis-trans isomerase | | 2.063 | 4 | 209 | 22.4 | | 1 | GGESIYGSK |
| M0T7K6 | *Musa acuminata* subsp. malaccensis | Peptidyl prolyl cis-trans isomerase | | 32.955 | 27 | 271 | 29.3 | | 6 | IVIGLYGDDVPQTAENFR |
| M0S9V6 | *Musa acuminata* subsp. malaccensis | Peptidyl prolyl cis-trans isomerase | | 26.605 | 21 | 249 | 26.8 | | 4 | IVIGLFGDDCPQTAENFR |
| M0U5Q9 | *Musa acuminata* subsp. malaccensis | Peptidyl prolyl cis-trans isomerase | | 1.72 | 2 | 581 | 64.7 | | 1 | TVTEIGDDKK |
| M0SE30 | *Musa acuminata* subsp. malaccensis | Peptidyl prolyl cis-trans isomerase | | 29.572 | 35 | 152 | 16.1 | | 5 | HTGPGVLSMANAGK |
| M0TJW5 | *Musa acuminata* subsp. malaccensis | Peptidyl prolyl cis-trans isomerase | | 25.741 | 35 | 244 | 28.6 | | 1 | YKPESCTIQAHKGDK |
| M0S0B4 | *Musa acuminata* subsp. malaccensis | Peptidyl prolyl cis-trans isomerase | | 2.022 | 7 | 118 | 12.9 | | 1 | SGKPLHYK |
| M0TK68 | *Musa acuminata* subsp. Malaccensis | Peptidyl prolyl cis-trans isomerase | | 1,088 | 2 | 236 | 25.2 | | 1 | VGAGQVVK |
| Nitrogen metabolism | | | | | | | | | | |
| M0STN9 | *Musa acuminata* subsp. malaccensis | Glutamate decarboxylase | | 3.363 | 2 | 489 | 55.2 | | 1 | LLNDLLTQK |
| M0UAF8 | *Musa acuminata* subsp. malaccensis | Glutamate decarboxylase | | 7.897 | 8 | 402 | 44.2 | | 3 | VASVTEPLLLNAVR |
| M0S7X3 | *Musa acuminata* subsp. malaccensis | NmrA domain protein | | 45.046 | 36 | 312 | 34 | | 7 | LVDVVISPVGFGQLSDQTK |
| M0SL13 | *Musa acuminata* subsp. malaccensis | NmrA domain protein | | 11.769 | 13 | 396 | 43.6 | | 5 | MGSQVLVPFR |
| M0SRR4 | *Musa acuminata* subsp. malaccensis | NmrA domain protein | | 6.691 | 6 | 381 | 42 | | 1 | LAQAGASGLPTDK |
| Ethylene biosynthesis | | | | | | | | | | |
| M0RP52 | *Musa acuminata* subsp. malaccensis | Tetratricopeptide repeat (TPR) | | 17.309 | 14 | 456 | 51.6 | | 3 | AMELDDGDISYLTNR |
| M0SR13 | *Musa acuminata* subsp. malaccensis | Tetratricopeptide repeat (TPR) | | 51.82 | 22 | 400 | 43.5 | | 6 | MGDPSVEVTDENRDVSQEAK |
| M0SYH8 | *Musa acuminata* subsp. malaccensis | Tetratricopeptide repeat (TPR) | | 28.032 | 28 | 283 | 32.1 | | 5 | DATAALEINPDSAK |
| M0TPL8 | *Musa acuminata* subsp. malaccensis | Tetratricopeptide repeat (TPR) | | 27.76 | 18 | 518 | 58.5 | | 5 | AMELDDGDISYLTNR |
| M0U1L0 | *Musa acuminata* subsp. malaccensis | Tetratricopeptide repeat (TPR) | | 8 | 8 | 329 | 36.6 | | 2 | IESYAPNLSYAPVGSR |
| M0S4E6 | *Musa acuminata* subsp. malaccensis | Tetratricopeptide repeat (TPR) | | 4.077 | 10 | 228 | 25.6 | | 2 | VLELDPANDQAR |
| M0THR7 | *Musa acuminata* subsp. malaccensis | Tetratricopeptide repeat (TPR) | | 0.846 | 2 | 346 | 38.4 | | 1 | ELVKEEPR |
| M0T0C8 | *Musa acuminata* subsp. malaccensis | S-adenosylmethionine synthetase | | 44.64 | 24 | 396 | 43.3 | | 1 | EHVIKPVIPEQYLDEK |
| M0SE45 | *Musa acuminata* subsp. malaccensis | S-adenosylmethionine synthetase | | 85.66 | 37 | 396 | 43.2 | | 3 | VHTVLISTQHDETVTNDEIAADLK |
| M0S638 | *Musa acuminata* subsp. malaccensis | S-adenosylmethionine synthetase | | 86.5 | 37 | 385 | 41.3 | | 3 | VLVNIEQQSPDIAQGVHGHFTK |
| M0TN23 | *Musa acuminata* subsp. malaccensis | S-adenosylmethionine synthetase | | 61.179 | 38 | 393 | 43.2 | | 3 | VHTVLISTQHDETVTNDEIAADLK |
| Antioxidant | | | | | | | | | | |
| M0SRM5 | *Musa acuminata* subsp. malaccensis | GFO_IDH_MocA protein | | 4.993 | 5 | 366 | 39.7 | | 2 | TQLVLDAVK |
| Flavanoid biosynthesis | | | | | | | | | | |
| M0T1R4 | *Musa acuminata* subsp. malaccensis | Polyketide synthases | | 4.931 | 3 | 372 | 39.9 | | 1 | LAETGIFNLR |
| M0TXG8 | *Musa acuminata* subsp. malaccensis | Polyketide synthases | | 86.374 | 67 | 309 | 32.7 | | 17 | SAMVSVIGLDSEK |
| M0SLZ5 | *Musa acuminata* subsp. malaccensis | Polyketide synthases | | 87.179 | 39 | 432 | 48.2 | | 5 | NIDFVQAAGLPLAIETANEGLER |
| M0RQJ5 | *Musa acuminata* subsp. malaccensis | Polyketide synthases | | 27.795 | 23 | 330 | 35.2 | | 6 | SLGADEVLDYK |
| M0TR95 | *Musa acuminata* subsp. malaccensis | Polyketide synthases | | 12.572 | 10 | 372 | 40.5 | | 3 | MLAAPINPSDINR |
| M0SP93 | *Musa acuminata* subsp. malaccensis | Polyketide synthases | | 9.306 | 12 | 325 | 34.2 | | 3 | GASPYPGLECSGTVLTVGK |
| M0SQC7 | *Musa acuminata* subsp. malaccensis | Polyketide synthases | | 9.262 | 8 | 364 | 39.1 | | 3 | LPSLGPYDVR |
| M0TAR8 | *Musa acuminata* subsp. malaccensis | Polyketide synthases | | 5.654 | 10 | 253 | 26.5 | | 3 | HVEIQVPSPK |
| M0UBN6 | *Musa acuminata* subsp. malaccensis | GRAM domain protein | | 18.292 | 30 | 248 | 27 | | 5 | DITSLPPEHNPYVTSSPAPK |
| Lipid metabolism | | | | | | | | | | |
| M0TUX7 | *Musa acuminata* subsp. malaccensis | Lipase | | 3.542 | 3 | 570 | 64.4 | | 1 | DDWAGLLDPIDPLLR |
| M0RPY9 | *Musa acuminata* subsp. malaccensis | Lipase | | 3.93 | 4 | 244 | 27.5 | | 1 | TNDNTGAYAR |
| M0S704 | *Musa acuminata* subsp. malaccensis | Lipase | | 6.547 | 8 | 355 | 38.6 | | 3 | DEAVVPVISK |
| M0RK90 | *Musa acuminata* subsp. malaccensis | Lipase | | 2.712 | 4 | 359 | 39.4 | | 1 | LLPSICGAPQECK |
| M0T3H2 | *Musa acuminata* subsp. malaccensis | Patatin | | 30.557 | 25 | 413 | 45.5 | | 9 | VNLETGDFEEVKGEGTNAEALTR |
| RNA processing | | | | | | | | | | |
| M0SNX0 | *Musa acuminata* subsp. malaccensis | RNA recognition motif (RRM) | | 27.009 | 51 | 158 | 16.1 | | 5 | SGGGGYGGGGGGFR |
| M0SYD6 | *Musa acuminata* subsp. malaccensis | RNA recognition motif (RRM) | | 21.173 | 29 | 278 | 29.8 | | 7 | VHSPETSVASPPDHPK |
| M0TMS3 | *Musa acuminata* subsp. malaccensis | RNA recognition motif (RRM) | | 14.531 | 26 | 155 | 15.5 | | 2 | CFVGGLAWATDDASLER |
| M0TY68 | *Musa acuminata* subsp. malaccensis | RNA recognition motif (RRM) | | 12.946 | 15 | 238 | 23.9 | | 3 | VFVGGLSYGTDDQSLR |
| M0TLA1 | *Musa acuminata* subsp. malaccensis | RNA recognition motif (RRM) | | 7.927 | 14 | 198 | 21.9 | | 2 | AFSAYGEIVDSK |
| M0SJ51 | *Musa acuminata* subsp. malaccensis | RNA recognition motif (RRM) | | 9.171 | 26 | 61 | 6.6 | | 1 | IFIGGLSYGTDDQSLR |
| M0U5V0 | *Musa acuminata* subsp. malaccensis | RNA recognition motif (RRM) | | 8.228 | 9 | 278 | 29.5 | | 2 | DDNASSSAGSAVQK |
| M0T583 | *Musa acuminata* subsp. malaccensis | RNA recognition motif (RRM) | | 7.927 | 14 | 198 | 21.9 | | 2 | DFDSLDSDGGPGPQR |
| M0SJ71 | *Musa acuminata* subsp. malaccensis | RNA recognition motif (RRM) | | 7.643 | 15 | 170 | 17.3 | | 1 | TLEQAFSPYGEIIESK |
| M0SA66 | *Musa acuminata* subsp. malaccensis | RNA recognition motif (RRM) | | 6.929 | 13 | 216 | 24.8 | | 2 | EMGSVQDPASAAASQASK |
| M0S591 | *Musa acuminata* subsp. malaccensis | RNA recognition motif (RRM) | | 5.67 | 4 | 302 | 33.2 | | 1 | GVASESSSIDQSK |
| M0RM57 | *Musa acuminata* subsp. malaccensis | RNA recognition motif (RRM) | | 4.481 | 3 | 394 | 45.8 | | 1 | AFDLYGAIVDVK |
| M0TQH3 | *Musa acuminata* subsp. malaccensis | RNA recognition motif (RRM) | | 3.933 | 3 | 305 | 32.4 | | 1 | HQLTSTASAK |
| M0SE09 | *Musa acuminata* subsp. malaccensis | RNA recognition motif (RRM) | | 3.289 | 5 | 230 | 25.3 | | 1 | EDEGTAHPTVR |
| M0RER4 | *Musa acuminata* subsp. malaccensis | RNA recognition motif (RRM) | | 1.261 | 3 | 215 | 23.9 | | 1 | TFGPVTR |
| M0SJ50 | *Musa acuminata* subsp. malaccensis | RNA recognition motif (RRM) | | 1.161 | 3 | 204 | 19.9 | | 1 | VNYANER |
| Pentose phosphate pathways | | | | | | | | | | |
| M0TUH8 | *Musa acuminata* subsp. malaccensis | Glucose-6-phosphate-1-dehydrogenase | | 1.955 | 2 | 520 | 59.4 | | 1 | SSSGQTEVLSR |
| Fatty acid metabolism | | | | | | | | | | |
| M0SMH7 | *Musa acuminata* subsp. malaccensis | Biotin carboxylase | | 9.192 | 5 | 531 | 58 | | 2 | LLEEAPSPALSPELR |
| M0SM56 | *Musa acuminata* subsp. malaccensis | Ceramidase | | 1.026 | 1 | 656 | 72.4 | | 1 | AVELFDK |
| Post-translational modification | | | | | | | | | | |
| M0SNE3 | *Musa acuminata* subsp. malaccensis | Protein phosphatase (PP) | | 8.401 | 7 | 356 | 38.8 | | 2 | NEASSTGDLGTSVQR |
| M0T3D0 | *Musa acuminata* subsp. malaccensis | Protein phosphatase (PP) | | 7.697 | 7 | 287 | 30.9 | | 2 | SSMEDFYETR |
| M0RL32 | *Musa acuminata* subsp. malaccensis | Protein phosphatase (PP) | | 2.331 | 4 | 283 | 31.5 | | 1 | DSKDDISCIVVR |
| M0TQT7 | *Musa acuminata* subsp. malaccensis | Protein phosphatase (PP) | | 31.505 | 39 | 283 | 30.8 | | 4 | VMSNEEAVDLIK |
| M0RGP4 | *Musa acuminata* subsp. malaccensis | Protein phosphatase (PP) | | 31.264 | 14 | 480 | 51.2 | | 1 | SKDDISCIVVK |
| M0TF93 | *Musa acuminata* subsp. malaccensis | Ubiquitin | | 8.092 | 18 | 147 | 16.6 | | 2 | LFCDKDYPDKPPSVR |
| M0U0L7 | *Musa acuminata* subsp. malaccensis | Ubiquitin | | 6.232 | 13 | 142 | 14.7 | | 1 | GTNFEIDVKPEDTVADVK |
| M0TLI8 | *Musa acuminata* subsp. malaccensis | Ubiquitin | | 4.175 | 11 | 108 | 12.1 | | 2 | VKGQDGNEVFFR |
| M0TY04 | *Musa acuminata* subsp. malaccensis | Ubiquitin | | 1.96 | 6 | 173 | 19.5 | | 1 | TNEAEAVETAK |
| M0RFG5 | *Musa acuminata* subsp. malaccensis | Ubiquitin | | 12.495 | 20 | 188 | 22.2 | | 3 | IQDKEGIPPDQQR |
| M0RUN0 | *Musa acuminata* subsp. malaccensis | Ubiquitin | | 8.449 | 13 | 235 | 25.9 | | 2 | SQPISHGPSSPDSLLQDAAK |
| Transcription factors | | | | | | | | | | |
| M0RIL2 | *Musa acuminata* subsp. malaccensis | BZIP domain protein | | 7.821 | 6 | 336 | 36.7 | | 1 | DTTGLTTENR |
| M0SZD3 | *Musa acuminata* subsp. malaccensis | NAC-A/B | | 82.718 | 48 | 239 | 26.8 | | 1 | SPTSDTYVIFGEAK |
| M0REF3 | *Musa acuminata* subsp. malaccensis | NAC-A/B | | 77.401 | 57 | 200 | 21.8 | | 1 | NILFVISKPDVFK |
| M0RYZ2 | *Musa acuminata* subsp. malaccensis | NAC-A/B | | 54.391 | 43 | 200 | 21.9 | | 2 | DIELVMTQAGVSR |
| M0RVE0 | *Musa acuminata* subsp. malaccensis | AP2/ERF domain | | 3.355 | 2 | 562 | 61.8 | | 1 | VLQDGGVWEK |
| Nucleotide metabolism | | | | | | | | | | |
| M0RV37 | *Musa acuminata* subsp. malaccensis | Histone H4 protein | | 23.415 | 35 | 150 | 16.4 | | 5 | TVTAMDVVYALK |
| M0TCC5 | *Musa acuminata* subsp. malaccensis | Histone H2B protein | | 27.823 | 28 | 207 | 23.3 | | 6 | AMSIMNSFINDIFEK |
| Transport | | | | | | | | | | |
| M0T8M2 | *Musa acuminata* subsp. malaccensis | Acyl carrier protein | | 12.912 | 20 | 139 | 14.8 | | 2 | QLALADDVSITGDSK |
| M0U500 | *Musa acuminata* subsp. malaccensis | Acyl carrier protein | | 11.503 | 11 | 141 | 14.8 | | 1 | QLALPENATVAGHSK |
| M0T0S8 | *Musa acuminata* subsp. malaccensis | Acyl carrier protein | | 6.32 | 4 | 456 | 48.4 | | 1 | ALESAGLGVGSQTLNK |
| M0T0A6 | *Musa acuminata* subsp. malaccensis | Clathrin light chain | | 11.373 | 16 | 319 | 34.9 | | 3 | VDTATAEGQAVK |
| M0U6U3 | *Musa acuminata* subsp. malaccensis | Clathrin light chain | | 10.486 | 11 | 369 | 40.1 | | 2 | VEEQADKAPEPSSDA |
| M0S0S3 | *Musa acuminata* subsp. malaccensis | Clathrin light chain | | 8.799 | 12 | 177 | 20.4 | | 1 | NQITAEAEEYK |
| M0U2X9 | *Musa acuminata* subsp. malaccensis | Clathrin light chain | | 22.793 | 37 | 186 | 21.3 | | 5 | HTPPPHMKPPPPPPPAAK |
| M0SS71 | *Musa acuminata* subsp. malaccensis | Clathrin light chain | | 17.238 | 12 | 349 | 38.5 | | 1 | LEEQADKAPAPTPDA |
| M0RP97 | *Musa acuminata* subsp. malaccensis | Clathrin light chain | | 17.198 | 20 | 321 | 35.1 | | 2 | KPSVVVIQGPKPGKPTDLSR |
| M0U6L8 | *Musa acuminata* subsp. malaccensis | V-ATPases | | 5.41 | 6 | 258 | 29.3 | | 1 | VGTLDSLLALSDDLVK |
| M0S8I6 | *Musa acuminata* subsp. malaccensis | ATPase_AAA protein | | 221.843 | 64 | 475 | 51.7 | | 20 | MGINPIMMSAGELESGNAGEPAK |
| M0TIX4 | *Musa acuminata* subsp. malaccensis | Cytosol adapter protein | | 29.705 | 18 | 496 | 51.9 | | 7 | TVDVIGFGSGTVVDQK |
| M0SZD3 | *Musa acuminata* subsp. malaccensis | NAC-A/B | | 82.718 | 48 | 239 | 26.8 | | 1 | SPTSDTYVIFGEAK |
| M0REF3 | *Musa acuminata* subsp. malaccensis | NAC-A/B | | 77.401 | 57 | 200 | 21.8 | | 1 | NILFVISKPDVFK |
| M0RYZ2 | *Musa acuminata* subsp. malaccensis | NAC-A/B | | 54.391 | 43 | 200 | 21.9 | | 2 | DIELVMTQAGVSR |
| M0SHD1 | *Musa acuminata* subsp. malaccensis | Importin | | 39.612 | 21 | 530 | 58.4 | | 8 | IVTVCLEGLENILK |
| M0RGY4 | *Musa acuminata* subsp. malaccensis | Flavodoxin | | 8.35 | 12 | 215 | 23.1 | | 2 | VAETLPSDVLEK |
