# Supplementary material
Source: Research Square preprint supplement (doi:10.21203/rs.3.rs-9184162/v1)
Supplement: Supplementary file 4 [file bcf504ab738c9f884bbc7c89.docx]

| Suppl. Table 3- Protein identified using orbitrap fusion mass spectrometry in banana fruit (pulp) tissues at 90-DAF (days after flowering). | | | | | | | | | |
| --- | --- | --- | --- | --- | --- | --- | --- | --- | --- |
| Accession No./Protein ID | **Origin/Taxonomy** | **Protein description** | **Sum peptide score** | **Coverage peptide** | **A.A** | **Protein molecular weight (KDa)** | **Unique Peptides** | | **Protein sequence** |
| Amino acid metabolism | | | | | | | | | |
| M0SIZ8 | *Musa acuminata* subsp. malaccensis | Cysteine proteinase inhibitor | 11.603 | 19 | 194 | 21.1 | 3 | | LVLSASDGSGASAK  QANAALALGK |
| M0S335 | *Musa acuminata* subsp. malaccensis | Phosphoglycerate kinase | 2.676 | 4 | 207 | 23.1 | 1 | | VDLNVPLDDSQK  VDLNVPLDDSQKITDDTR |
| M0SU77 | *Musa acuminata* subsp. malaccensis | Phosphoglycerate kinase | 9.475 | 9 | 479 | 50 | 3 | | SVGDLTAADLKGK  TFNDALDTTK |
| M0SUG2 | *Musa acuminata* subsp. malaccensis | Phosphoglycerate kinase | 5.764 | 3 | 401 | 42.2 | 1 | | SVGALTEADLK |
| M0TVU9 | *Musa acuminata* subsp. malaccensis | Phosphoglycerate kinase | 4.004 | 2 | 401 | 42.4 | 1 | | TFSESLDTTK |
| M0SHZ7 | *Musa acuminata* subsp. malaccensis | Glycine cleavage system P protein | 2.686 | 2 | 987 | 106.6 | 1 | | IIGVSVDSSGKPALR |
| M0SK05 | *Musa acuminata* subsp. Malaccensis | 40S ribosomal protein S30 | 3.873 | 10 | 101 | 11.3 | 1 | | FVTAVVGFGK |
| M0RJJ1 | *Musa acuminata* subsp. malaccensis | 40S ribosomal protein S30 | 3.271 | 4 | 249 | 28.3 | 1 | | LSAASKPSLAA |
| M0T8V4 | *Musa acuminata* subsp. malaccensis | 40S ribosomal protein S8 | 3.873 | 4 | 217 | 24.4 | 1 | | ADGYILEGK |
| M0SUJ7 | *Musa acuminata* subsp. malaccensis | Aminomethyltransferase | 2.59 | 3 | 413 | 44.6 | 1 | | GGAIDDSVVTK |
| Sugar metabolism | | | | | | | | | |
| M0U300 | *Musa acuminata* subsp. malaccensis | UTP-glucose-1-phosphate uridylyltransferase | 66.053 | 27 | 467 | 51.3 | | 10 | SGFISLVSR  LVMEDFQPLPSK |
| M0TNV2 | *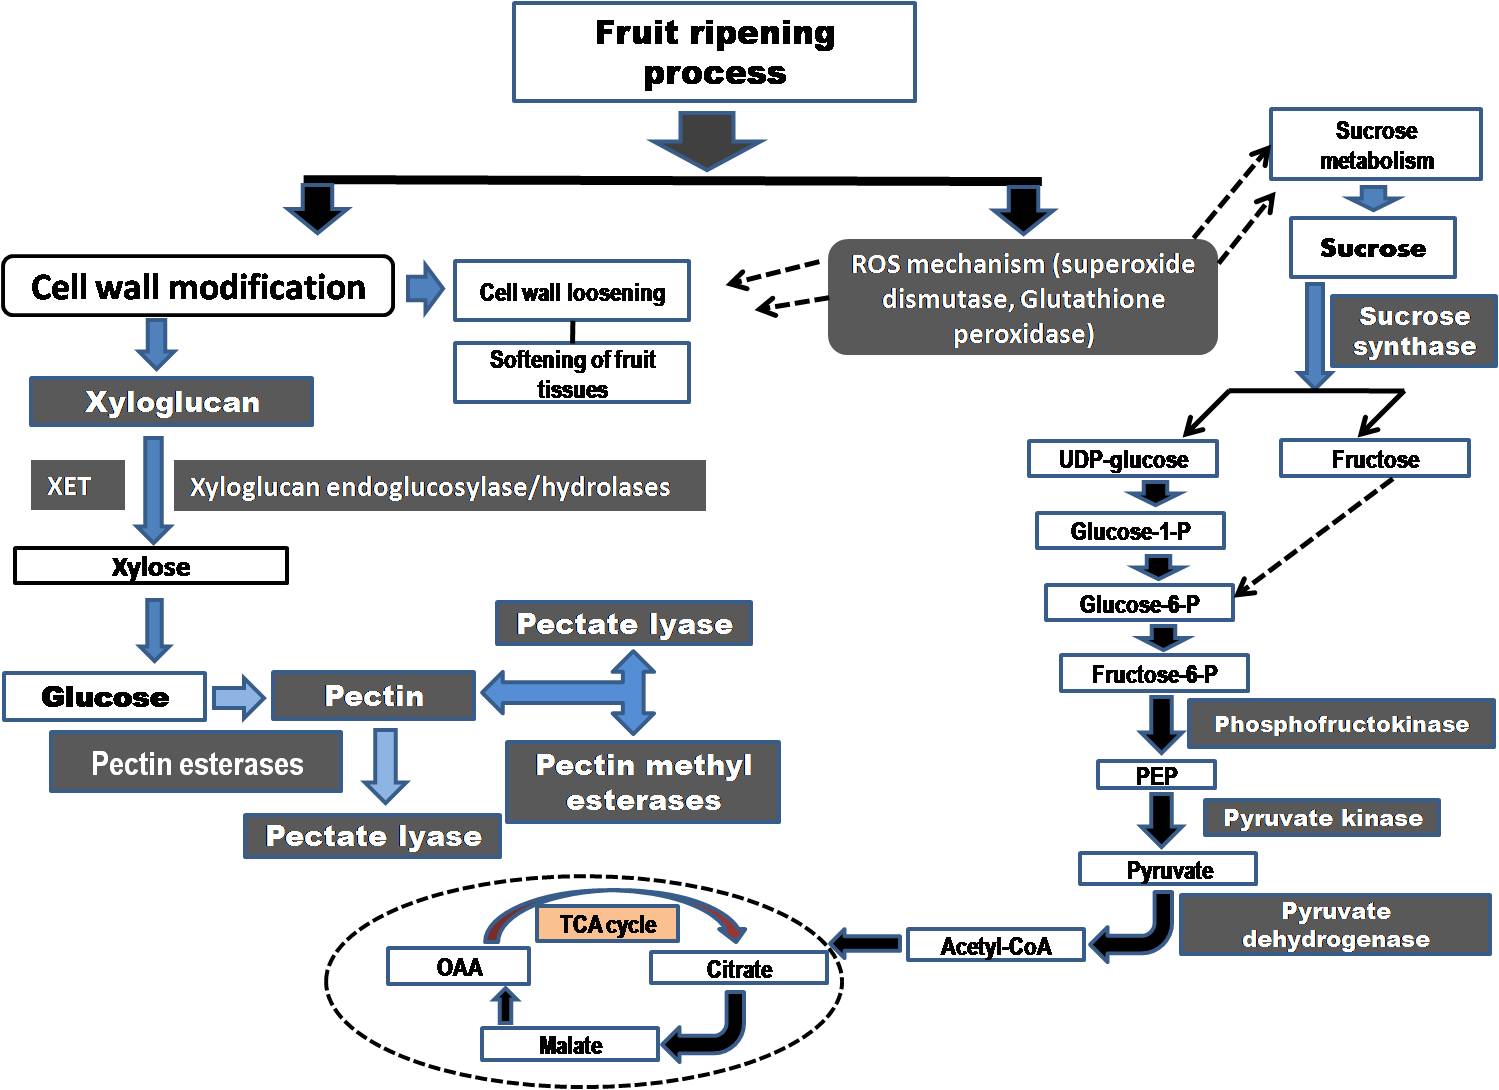Musa acuminata* subsp. malaccensis | Fructose-bisphosphate aldolase | 26.918 | 12 | 333 | 35.8 | | 3 | VAPEVVAEHTVR  LASINVENVEENRR |
| M0TNG5 | *Musa acuminata* subsp. malaccensis | Fructose-bisphosphate aldolase | 25.56 | 11 | 365 | 39.1 | | 3 | VAPEVVAEYTVR |
| M0T0S2 | *Musa acuminata* subsp. malaccensis | ATP-dependent 6-Phosphofructokinase | 7.203 | 5 | 471 | 51.5 | | 2 | QTIRFDPAAVR  SVTTQPDFLKI |
| M0RJE1 | *Musa acuminata* subsp. malaccensis | Sucrose synthase | 1.869 | 1 | 816 | 92.9 | | 1 | QGLDITPR |
| Starch biosynthesis | | | | | | | | | |
| M0RYE9 | *Musa acuminata* subsp. malaccensis | Glucose-1-phosphate adenyltransferase | 13.75 | 10 | 525 | 57.5 | | 6 | RAKPAVPLGANYR  SGIVTVIK |
| M0SMS9 | *Musa acuminata* subsp. malaccensis | Glucose-1-phosphate adenyltransferase | 1.359 | 2 | 462 | 51.7 | | 1 | TPIFTSPR |
| M0RY27 | *Musa acuminata* subsp. malaccensis | Starch synthase | 2.914 | 2 | 616 | 68 | | 1 | EALQAELGLPVDR |
| Secondary metabolism | | | | | | | | | |
| M0T1L6 | *Musa acuminata* subsp. malaccensis | Glyceraldehyde-3-phosphate dehydrogenase | 24.095 | 15 | 394 | 42.9 | | 2 | VIISAPSK  TVDGPSSKDWR |
| M0RTJ1 | *Musa acuminata* subsp. malaccensis | Glyceraldehyde-3-phosphate dehydrogenase | 24.095 | 12 | 418 | 46 | | 1 | AASFNIIPSSTGAAKAVGK |
| M0T1H5 | *Musa acuminata* subsp. malaccensis | Pyruvate dehydrogenase E1 component subunit beta | 12.901 | 9 | 414 | 45 | | 3 | MAVPQVDDIVR  VLSPYSSEDAR |
| M0SF31 | *Musa acuminata* subsp. malaccensis | 6-phosphogluconate dehydrogenase, decarboxylating | 8.483 | 7 | 470 | 50.9 | | 3 | SPQDFVLSLR  AATEGGLPLSGHR |
| M0SVE1 | *Musa acuminata* subsp. malaccensis | 6-phosphogluconate dehydrogenase, decarboxylating | 2.421 | 2 | 464 | 51.2 | | 1 | TTSKVDETVER |
| M0T8J4 | *Musa acuminata* subsp. malaccensis | 3-Isopropylmalate dehydrogenase | 5.305 | 1 | 967 | 106.6 | | 1 | SVEAGKQVAALH |
| M0TJL5 | *Musa acuminata* subsp. malaccensis | Methylenetetrahydrofolate reductase | 3.314 | 2 | 595 | 66.8 | | 1 | TVGWDQYPHGR |
| M0SZQ4 | *Musa acuminata* subsp. malaccensis | Pyruvate dehydrogenase E1 component subunit alpha | 3.118 | 1 | 902 | 100.8 | | 1 | EVAVEAIGR |
| M0SPM6 | *Musa acuminata* subsp. malaccensis | Zeta-carotene desaturase | 1.265 | 1 | 576 | 63.6 | | 1 | LALIDSER |
| M0RGD1 | *Musa acuminata* subsp. malaccensis | Acetyltransferase component of pyruvate dehydrogenase complex | 20.14 | 9 | 635 | 68.9 | | 5 | IVKADVVDYLASR  ADVVDYLASR |
| Fatty acid metabolism | | | | | | | | | |
| M0TQ39 | *Musa acuminata* subsp. malaccensis | Catalase | 23.105 | 9 | 492 | 57.2 | | 5 | SWAPDRQER  ENNFKQPGER |
| M0S2A5 | *Musa acuminata* subsp. malaccensis | Lipoxygenase | 16.778 | 8 | 846 | 95.5 | | 6 | LTEQGLPDDLLK  NLEGLTVQK |
| M0UAN0 | *Musa acuminata* subsp. malaccensis | Lipoxygenase | 3.256 | 8 | 166 | 18.7 | | 1 | DTPEWTSDER |
| TCA cycle | | | | | | | | |  |
| M0RFU7 | *Musa acuminata* subsp. malaccensis | D-3-phosphoglycerate dehydrogenase | 22.798 | 12 | 616 | 65 | | 7 | SARDPDDLDTR  QVDQPGMIGHVGR |
| M0RI43 | *Musa acuminata* subsp. malaccensis | Citrate synthase | 8.416 | 5 | 476 | 52.4 | | 2 | IYDPGYLNTAPVR  YALPVSTEGTVK |
| M0TKF8 | *Musa acuminata* subsp. Malaccensis | Pyruvate kinase | 7.097 | 3 | 603 | 66.4 | | 2 | AEVSDIAIAVR  LAEAGMNVAR |
| M0S9L2 | *Musa acuminata* subsp. Malaccensis | Pyruvate kinase | 2.224 | 1 | 546 | 59.6 | | 1 | IVGTLGPK |
| M0SF48 | *Musa acuminata* subsp. malaccensis | Phosphotransferase | 3.334 | 2 | 500 | 53.9 | | 1 | LAAAGVAGILK |
| M0TFQ1 | *Musa acuminata* subsp. malaccensis | Glucose-6-phosphate isomerase | 2.501 | 2 | 631 | 70.2 | | 1 | FLANVDPVDVAR |
| M0U0G8 | *Musa acuminata* subsp. malaccensis | Glucose-6-phosphate isomerase | 2.092 | 3 | 234 | 25.2 | | 1 | NGLLEVQK |
| Signal transduction | | | | | | | | | |
| M0SZK9 | *Musa acuminata* subsp. malaccensis | Nucleoside diphosphate kinase | 25.505 | 27 | 148 | 16.3 | | 4 | NVIHGSDSIESASK  IIGATNPADSAPGTIR |
| M0TQK4 | *Musa acuminata* subsp. Malaccensis | Nucleoside diphosphate kinase | 3.224 | 11 | 148 | 16.5 | | 1 | KIIGATNPSDSSPGTIR |
| M0TLK7 | *Musa acuminata* subsp. malaccensis | Biotin carboxyl carrier protein of acetyl-CoA carboxylase | 10.458 | 6 | 285 | 29.4 | | 2 | ALPSPAAASSAPK  ALPSPAAASSAPKASK |
| M0TTB7 | *Musa acuminata* subsp. malaccensis | Biotin carboxylase | 7.446 | 5 | 592 | 64.7 | | 2 | SEAAAAFGNDGVYLEK  ITSYLPSGGPFVR |
| M0SS87 | *Musa acuminata* subsp. malaccensis | Tubulin beta chain | 6.928 | 4 | 446 | 50.2 | | 2 | VNVYYNEASGGR  VNVYYNEASGGRYVPR |
| M0T8J7 | *Musa acuminata* subsp. malaccensis | Tubulin beta chain | 6.174 | 4 | 414 | 46.6 | | 2 | INVYYNEASGGRYVPR  INVYYNEASGGR |
| M0S7D0 | *Musa acuminata* subsp. malaccensis | Tubulin alpha chain | 6.511 | 7 | 450 | 49.6 | | 2 | QLFHPEQLISGKEDAANNFAR |
| M0TQK4 | *Musa acuminata* subsp. malaccensis | Nucleoside diphosphate kinase | 3.224 | 11 | 148 | 16.5 | | 1 | KIIGATNPSDSSPGTIR |
| M0TDN3 | *Musa acuminata* subsp. malaccensis | Non-specific serine/threonine protein kinase | 1.088 | 1 | 671 | 77.5 | | 1 | FNVAPAPR |
| Redox homeostasis | | | | | | | | |  |
| M0RNE8 | *Musa acuminata* subsp. malaccensis | Aconitate hydratase | 21.393 | 6 | 986 | 107.1 | | 7 | QVEIPFKPAR  TSLAPGSGVVTK |
| M0U3M5 | *Musa acuminata* subsp. malaccensis | Sulfurtransferase | 5.627 | 3 | 377 | 41.1 | | 2 | FDGAAPEPR  ARFDGAAPEPR |
| M0TYD9 | *Musa acuminata* subsp. malaccensis | Cytochrome b-c1 complex subunit 7 | 2.489 | 9 | 123 | 14.6 | | 1 | EALGALPLYQR |
| M0SZ91 | *Musa acuminata* subsp. malaccensis | Cysteine synthase | 0.886 | 3 | 384 | 40.9 | | 1 | IQGIGAGFVPR |
| M0RP81 | *Musa acuminata* subsp. malaccensis | Glutathione peroxidase | 1.86 | 7 | 168 | 18.5 | | 1 | YAPTTSPLSIEK |
| M0SWM2 | *Musa acuminata* subsp. malaccensis | Glutathione peroxidase | 2.257 | 6 | 170 | 19.2 | | 1 | SPSSIEQDIQK |
| Photosynthesis | | | | | | | | |  |
| M0TDM1 | *Musa acuminata* subsp. malaccensis | Succinate dehydrogenase [ubiquinone] flavoprotein subunit, mitochondrial | 19.434 | 6 | 599 | 65.8 | | 4 | NSEGERFMER  YAPTAKDLASR |
| M0RQK4 | *Musa acuminata* subsp. malaccensis | Succinate dehydrogenase [ubiquinone] iron-sulfur subunit, mitochondrial | 4.236 | 6 | 283 | 31.6 | | 2 | GLNPAKQIESIK  TFSIYR |
| M0SM75 | *Musa acuminata* subsp. malaccensis | Malate dehydrogenase | 16.851 | 10 | 347 | 36.3 | | 4 | RTQDGGTEVVEAK |
| M0SR05 | *Musa acuminata* subsp. malaccensis | Malate dehydrogenase | 3.029 | 3 | 332 | 35.5 | | 1 | LNVQVSDVK |
| M0T8J4 | *Musa acuminata* subsp. malaccensis | 3-isopropylmalate dehydrogenase | 5.305 | 1 | 967 | 106.6 | | 1 | SVEAGKQVAALH |
| M0U9P4 | *Musa acuminata* subsp. malaccensis | Fructose-bisphosphate aldolase | 7.895 | 6 | 392 | 42.9 | | 1 | ANSLAQLGR  AGSYTDELVQTAK |
| M0T5K0 | *Musa acuminata* subsp. malaccensis | Fructose-bisphosphate aldolase | 6.755 | 10 | 352 | 38.4 | | 2 | ANSLAQLGR  AGSYTDELVQTAK |
| M0TNV2 | *Musa acuminata* subsp. malaccensis | Fructose-bisphosphate aldolase | 26.918 | 12 | 333 | 35.8 | | 2 | VAPEVVAEHTVR  LASINVENVEENRR |
| M0TNG5 | *Musa acuminata* subsp. malaccensis | Fructose-bisphosphate aldolase | 25.56 | 11 | 365 | 39.1 | | 3 | VAPEVVAEYTVR  GILAADESTGTIGKR |
| M0RP81 | *Musa acuminata* subsp. malaccensis | Glutathione peroxidase | 1.86 | 7 | 168 | 18.5 | | 1 | YAPTTSPLSIEK |
| M0SWM2 | *Musa acuminata* subsp. malaccensis | Glutathione peroxidase | 2.257 | 6 | 170 | 19.2 | | 1 | SPSSIEQDIQK |
| Molecular chapperones | | | | | | | | | |
| M0T186 | *Musa acuminata* subsp. malaccensis | Proteasome subunit beta | 4.926 | 9 | 233 | 25 | | 2 | TVTINADGVTK  TSTGMYVANR |
| M0RJY3 | *Musa acuminata* subsp. malaccensis | Proteasome subunit alpha | 8.479 | 6 | 265 | 29.3 | | 1 | NQYDTDVTTWSPAGR |
| M0S1G7 | *Musa acuminata* subsp. malaccensis | Tubulin-specific chaperone | 3.535 | 16 | 112 | 12.6 | | 1 | GADPYDLKQQENVLAESR |
| M0SWY3 | *Musa acuminata* subsp. malaccensis | T-complex protein 1 subunit gamma | 5.246 | 3 | 557 | 60.7 | | 2 | DLLNEVER  IDDIVSGIK |
| M0TSC9 | *Musa acuminata* subsp. malaccensis | CASP-like protein | 4.449 | 11 | 205 | 22.2 | | 1 | AAPGAAAHPSAPAADEGGTVVR |
| Protein folding | | | | | | | | | |
| M0S0K5 | *Musa acuminata* subsp. malaccensis | Protein disulfide-isomerase | 18.316 | 13 | 507 | 56.3 | | 6 | TNSDATSQPDSPHSAKDEL |
| M0S680 | *Musa acuminata* subsp. malaccensis | ATP-dependent CIP Proteolytic subunit | 7.117 | 6 | 587 | 63.4 | | 2 | AAGAGPQAAPSGFR  NYDEMLAQSK |
| M0TSN5 | *Musa acuminata* subsp. malaccensis | ATP-dependent CIP Proteolytic subunit | 8.479 | 6 | 265 | 32.5 | | 2 | ALQPLPATQE  YSLPNSR |
| M0U7Z5 | *Musa acuminata* subsp. malaccensis | 60S ribosomal protein L13 | 5.583 | 7 | 152 | 17.5 | | 1 | SLEGLQANVQR |
| M0T5Y4 | *Musa acuminata* subsp. malaccensis | Proteasome endopeptidase complex | 2.911 | 3 | 305 | 33.5 | | 1 | GVNTFSPEGR |
| M0RYR4 | *Musa acuminata* subsp. malaccensis | 26S proteasome non-ATPase regulatory subunit | 6.107 | 3 | 1011 | 109.6 | | 2 | KVEPEPSYEVLTNPAR  VVPAQEKYIR |
| Nitrogen metabolism | | | | | | | | | |
| M0STN9 | *Musa acuminata* subsp. malaccensis | Glutamate decarboxylase | 56.315 | 8 | 489 | 55.2 | | 3 | NYVDMDEYPVTTELQNR  YVRDSLPR |
| M0SWM2 | *Musa acuminata* subsp. Malaccensis | Glutamate decarboxylase | 2.572 | 10 | 457 | 62.3 | | 2 | SPSSIEQDIQK |
| M0SM28 | *Musa acuminata* subsp. malaccensis | Aspartate aminotransferase | 11.289 | 15 | 421 | 46 | | 6 | RAEQLLVNDPSR  TEEGKPLVLNVVR |
| M0SD29 | *Musa acuminata* subsp. malaccensis | Glutamine synthatase | 1.822 | 2 | 404 | 44.9 | | 1 | AAKELQLQV |
| Energy and carbohydrate metabolism | | | | | | | | | |
| M0SIS6 | *Musa acuminata* subsp. malaccensis | ATP synthase subunit beta | 84.871 | 5 | 567 | 60.5 | | 1 | MLSPHVLGEEHYNTAR  VLNTGSPITVPVGR |
| M0RLV9 | *Musa acuminata* subsp. malaccensis | ATP synthase subunit d, mitochondrial | 5.292 | 17 | 145 | 17.2 | | 2 | YVDTVTPEYKPK  AFDEVNSQLQTK |
| M0SU77 | *Musa acuminata* subsp. malaccensis | Phosphoglycerate kinase | 19.03 | 9 | 479 | 50 | | 3 | SVGDLTAADLKGK  ADLNVPLDEDRNITDDTR |
| M0TVU9 | *Musa acuminata* subsp. malaccensis | Phosphoglycerate kinase | 4.004 | 2 | 401 | 42.4 | | 1 | TFSESLDTTK |
| M0UAJ6 | *Musa acuminata* subsp. malaccensis | Malic enzyme | 6.259 | 4 | 590 | 64.9 | | 2 | AIKPTALIGSSGVGK  QYQLPLQR |
| M0RRG7 | *Musa acuminata* subsp. Malaccensis | Aldehyde dehydrogenase | 2.493 | 2 | 493 | 53.4 | | 1 | AAVLVAGLR |
| M0SMS9 | *Musa acuminata* subsp. malaccensis | Glucose-1-phosphate adenylyltransferase | 1.359 | 2 | 462 | 51.7 | | 1 | TPIFTSPR |
| M0RYE9 | *Musa acuminata* subsp. malaccensis | Glucose-1-phosphate adenylyltransferase | 13.75 | 10 | 525 | 57.5 | | 1 | RAKPAVPLGANYR  VDTTILGLDNER |
| Cell wall modification | | | | | | | | | |
| M0TBJ2 | *Musa acuminata* subsp. malaccensis | Peroxidase | 9.838 | 12 | 366 | 40 | | 4 | QALSNINSLR  DAVVLSGGPEWDVR |
| M0TD21 | *Musa acuminata* subsp. malaccensis | Glycylpeptide N-tetra decanoyl transferase | 4.61 | 5 | 355 | 39.9 | | 1 | AAAAAEGDGEVESLAR |
| M0SU22 | *Musa acuminata* subsp. malaccensis | Alpha-1,4-glucan phosphorylase | 27.795 | 8 | 927 | 104.7 | | 8 | SGNSVNWKEFPTK  FADDEDLHSEWR |
| M0RPM3 | *Musa acuminata* subsp. malaccensis | Pectinesterase | 5.064 | 2 | 566 | 62.1 | | 1 | VGADLSAFYR |
| M0SQP6 | *Musa acuminata* subsp. malaccensis | Beta-galactosidase | 2.396 | 2 | 871 | 95.4 | | 2 | NQPLVWYK  ALVIDGTR |
| M0RVL3 | *Musa acuminata* subsp. malaccensis | Beta-galactosidase | 1.239 | 1 | 817 | 90.9 | | 1 | SITVDTISVAR |
| M0TE13 | *Musa acuminata* subsp. malaccensis | Alpha-mannosidase | 6.228 | 2 | 1142 | 129.5 | | 1 | VGSGGGGGLLPSTTATAK |
| M0SA45 | *Musa acuminata* subsp. malaccensis | 4-alpha-glucanotransferase | 9.227 | 6 | 743 | 84 | | 2 | MNIPATQLGNWK  TVEDLKDPLIAK |
| Transport | | | | | | | | | |
| M0U500 | *Musa acuminata* subsp. malaccensis | Acyl-carrier protein | 8.623 | 11 | 141 | 14.8 | | 1 | QLALPENATVAGHSK |
| M0TNS2 | *Musa acuminata* subsp. malaccensis | Acyl-[Acyl-carrier protein] hydrolase | 2.095 | 2 | 365 | 40.7 | | 1 | LADPAQYSR |
| M0T8M2 | *Musa acuminata* subsp. malaccensis | Acyl-carrier protein | 4.882 | 11 | 139 | 14.8 | | 1 | QLALADDVSITGDSK |
| M0TVW6 | *Musa acuminata* subsp. malaccensis | Acyl-carrier protein | 3.724 | 11 | 140 | 15 | | 1 | KQLAVPEGTAVIAESK |
| M0T234 | *Musa acuminata* subsp. malaccensis | Importin subunit alpha | 5.5 | 3 | 817 | 60.4 | | 1 | SPPIEEVIQSGVVPR |
| M0TWL9 | *Musa acuminata* subsp. malaccensis | Serine hydroxymethyltransferase | 10.402 | 7 | 438 | 48.1 | | 3 | SGMIFYR  NAVFGDSSALAPGGVR |
| M0SR43 | *Musa acuminata* subsp. malaccensis | Plasma membrane ATPase | 5.299 | 3 | 955 | 105.1 | | 2 | SLAVAYQEVPEGR  TLHGLQPPDTK |
| M0RYP4 | *Musa acuminata* subsp. malaccensis | Plasma membrane ATPase | 3.458 | 2 | 954 | 105.3 | | 1 | ALNLGVNVK |
| M0RLV9 | *Musa acuminata* subsp. malaccensis | ATPase synthase subunit d, mitochondrial | 5.292 | 17 | 145 | 17.2 | | 2 | YVDTVTPEYKPK  AFDEVNSQLQTK |
| M0S4Q6 | *Musa acuminata* subsp. malaccensis | Coatomer subunit epsilon | 3.995 | 3 | 290 | 32 | | 1 | MASAEDNFDR |
| M0SWS3 | *Musa acuminata* subsp. malaccensis | Protein transport protein Sec61 subunit beta | 2.045 | 22 | 106 | 10.3 | | 1 | GSSQSQTAASAGGGARPAGAVPR |
| M0U2X9 | *Musa acuminata* subsp. malaccensis | Clathrin light chain | 2.104 | 4 | 186 | 21.3 | | 2 | TIAELIPR |
| Stress response and defense | | | | | | | | | |
| M0S4H9 | *Musa acuminata* subsp. malaccensis | Superoxide dismutase | 8.618 | 37 | 152 | 15.2 | | 3 | VDNQIPLSGPNSIIGR  AVVVHADPDDLGKGGHELSK |
| M0S978 | *Musa acuminata* subsp. malaccensis | Superoxide dismutase | 4.39 | 4 | 245 | 26.8 | | 1 | YASEVYEKETA |
| M0S4H9 | *Musa acuminata* subsp. malaccensis | Superoxide dismutase [Cu-Zn] | 8.618 | 37 | 152 | 15.2 | | 3 | VDNQIPLSGPNSIIGR  AVVVHADPDDLGKGGHELSK  HAGDLGNVTAGEDGTVTISK |
| M0RIV9 | *Musa acuminata* subsp. Malaccensis | Dirigent protein | 7.289 | 6 | 188 | 20.1 | | 1 | VGSDASSTVVGR |
| Nucleotide metabolism | | | | | | | | | |
| M0TUR1 | *Musa acuminata* subsp. malaccensis | Orotidine 5’-phosphate decarboxylase | 5.834 | 6 | 387 | 41.6 | | 2 | ITDAVVVIDR  VAVSTPAVTKPIVR |
| Lipid metabolism | | | | | | | | |  |
| M0SPH7 | *Musa acuminata* subsp. malaccensis | Non-specific lipid-transfer protein | 7.854 | 11 | 119 | 12.1 | | 1 | TAAAGLSGIDYGR |
| M0RI25 | *Musa acuminata* subsp. malaccensis | Profilin | 3.22 | 10 | 131 | 14.3 | | 1 | YMVIQGEPGAVIR |
| M0S2A5 | *Musa acuminata* subsp. malaccensis | Lipoxygenase | 16.778 | 8 | 846 | 95.5 | | 6 | LTEQGLPDDLLK  NLEGLTVQK |
| M0UAN0 | *Musa acuminata* subsp. malaccensis | Lipoxygenase | 3.256 | 8 | 166 | 18.7 | | 1 | DTPEWTSDER |
| Cell division | | | | | | | | | |
| M0SVY4 | *Musa acuminata* subsp. malaccensis | Peptidylprolyl isomerase | 4.482 | 15 | 121 | 13.2 | | 2 | DPGQQPFTFK |
| M0U5Q9 | *Musa acuminata* subsp. malaccensis | Peptidylprolyl isomerase | 3.992 | 3 | 581 | 64.7 | | 1 | EGEGYERPNDGAVVR |
| M0TA32 | *Musa acuminata* subsp. Malaccensis | Exocyst complex component SEC5 | 3.203 | 1 | 1108 | 124.9 | | 1 | VDEAELAR |
| M0T3A3 | *Musa acuminata* subsp. malaccensis | GTP-binding nuclear protein | 2.845 | 4 | 476 | 54.1 | | 2 | LVIVGDGGTGK  NLQYYEISAK |
| Pentose phosphate pathways | | | | | | | | | |
| M0SVE1 | *Musa acuminata* subsp. malaccensis | 6-phosphogluconate dehydrogenase, decarboxylating | 2.421 | 2 | 464 | 51.2 | | 1 | TTSKVDETVER |
| M0SF31 | *Musa acuminata* subsp. malaccensis | 6-phosphogluconate dehydrogenase, decarboxylating | 8.483 | 7 | 470 | 50.9 | | 3 | AATEGGLPLSGHR  SPQDFVLSLR |
| M0U174 | *Musa acuminata* subsp. malaccensis | Xylose isomerase | 1.425 | 2 | 221 | 24.3 | | 1 | GTGADPFGAPTK |
| M0RXL0 | *Musa acuminata* subsp. malaccensis | Purple acid phosphatase | 2.984 | 2 | 553 | 62.3 | | 1 | GSDDLPIDHPR |
| RNA processing | | | | | | | | | |
| M0S5Z8 | *Musa acuminata* subsp. malaccensis | Eukaryotic translation initiation factor 3 subunit 1 | 26.97 | 1 | 321 | 35.4 | | 6 | SFSSGGEDGYVR  TIISAGEDAVVR |
| M0SMK6 | *Musa acuminata* subsp. malaccensis | Polyadenylate-binding protein | 4.235 | 1 | 652 | 71.2 | | 1 | VAEALEVLR |
| M0SH35 | *Musa acuminata* subsp. malaccensis | Eukaryotic translation factor 3 subunit A | 3.104 | 1 | 996 | 116.2 | | 1 | TSSSSSSWSSSRPR |
| M0TJH0 | *Musa acuminata* subsp. malaccensis | Eukaryotic translation factor 3 subunit A | 4.688 | 3 | 440 | 51.4 | | 1 | NIVEPAQAAQATR |
| Post-translational modification | | | | | | | | | |
| M0TR77 | *Musa acuminata* subsp. malaccensis | Annexin | 2.649 | 5 | 316 | 35.9 | | 2 | NIVEPAQAAQATR |
| M0RJJ1 | *Musa acuminata* subsp. malaccensis | 40S ribosomal protein S6 | 3.271 | 4 | 249 | 28.3 | | 1 | LSAASKPSLAA |
| M0T8V4 | *Musa acuminata* subsp. Malaccensis | 40S ribosomal protein S8 | 1.79 | 4 | 217 | 24.4 | | 1 | ADGYILEGK |
| M0SK05 | *Musa acuminata* subsp. malaccensis | 40S ribosomal protein S30 | 3.873 | 1 | 101 | 11.3 | | 1 | FVTAVVGFGK |
| M0RJE7 | *Musa acuminata* subsp. malaccensis | Proteasome subunit alpha type | 19.394 | 3 | 339 | 37.2 | | 3 | GVNTFSPEGR |
| Hormone regulation | | | | | | | | | |
| M0RVE6 | *Musa acuminata* subsp. malaccensis | Inositol-1-monophosphatase | 5.203 | 4 | 360 | 39 | | 1 | VAAESTGPIPAAELLK |
